# Supplementary material for: Reaction of unsymmetrical α-bromo-1,3-diketones with N-substituted thioureas: regioselective access to 2-(N-arylamino)-5-acyl-4-methylthiazoles and/or rearranged 2-(N-acylimino)-3-N-aryl-4-methylthiazoles
Source: Royal Society of Chemistry journal article supplement (doi:10.1039/d4ra05436a), 2024-01-01
Supplement: d4ra05436a1.pdf [file d4ra05436a1.pdf]

## Supplementary information

### **Reaction of Unsymmetrical $\alpha$ -Bromo-1,3-diketones with *N*-Substituted Thioureas: Regioselective Access to 2-(*N*-arylamino)-5-acyl-4-methylthiazoles and/or Rearranged 2-(*N*-acylimino)-3-*N*-aryl-4-methylthiazoles**

Ranjana Aggarwal,<sup>a,b\*</sup> Shilpa Sharma,<sup>a</sup> Naman Jain,<sup>a</sup> Dionisia Sanz,<sup>c</sup> Rosa M. Claramunt,<sup>c</sup> Patricia Delgado,<sup>d</sup> M. Carmen Torralba,<sup>e</sup>

<sup>a</sup>*Department of Chemistry, Kurukshetra University, Kurukshetra, Haryana, India*

<sup>b</sup>*CSIR- National Institute of Science Communication and Policy Research, New Delhi, India*

<sup>c</sup>*Departamento de Química Orgánica y Bio-orgánica, Facultad de Ciencias, UNED, Avenida Esparta s/n, E-28232 Las Rozas, Madrid, Spain*

<sup>d</sup>*Unidad de Difracción de Rayos X - CAI de Técnicas Químicas, Facultad de Ciencias Químicas, UCM, E-28040 Madrid, Spain*

<sup>e</sup>*Departamento de Química Inorgánica, Facultad de Ciencias Químicas, UCM, E-28040 Madrid, Spain*

\*Corresponding author:

Prof. Ranjana Aggarwal, CSIR- National Institute of Science Communication and Policy Research, New Delhi, India Tel. (+91) 9896740740

E-mails: [ranjana67in@yahoo.com](mailto:ranjana67in@yahoo.com), [ranjanaaggarwal67@gmail.com](mailto:ranjanaaggarwal67@gmail.com)

## TABLE OF CONTENTS

|                                                                                                                                                                   | Page No. |
|-------------------------------------------------------------------------------------------------------------------------------------------------------------------|----------|
| <b>General Synthesis</b>                                                                                                                                          | S3       |
| <b>Characterization of final compounds</b><br><sup>1</sup> H NMR, <sup>13</sup> C NMR, HMBC and HMQC of<br>final compounds<br><b>Figures S1-S23, Tables S1-S4</b> | S4-S35   |
| <b>X-ray analytical data Table S5</b>                                                                                                                             | S36-S37  |

**General method for the synthesis:**

1,3-Diketone **1a-e** (1.0 mmol) was ground with *N*-bromo succinimide **2** (0.177 g, 1.0 mmol) in dry pestle mortar until a thick paste was formed and the reaction mass was added subsequently with *N*-substituted thiourea derivative **7a-f** (1.0 mmol) and sodium carbonate (0.108 g, 1.0 mmol). The reaction mixture was homogenized properly at room temperature for 5 min, transferred to a conical flask and heated at temperature 80 °C. The reaction progress was monitored with TLC. On completion of reaction, the reaction mixture was added with water and filtered to get the coarse product which was recrystallized from boiling ethanol.

## Characterization of final compounds

<sup>1</sup>H NMR, <sup>13</sup>C NMR, HMBC and HMQC of final compounds

### 1. 2-(*N*-phenylamino)-4-methyl-5-benzoylthiazole (8aa)

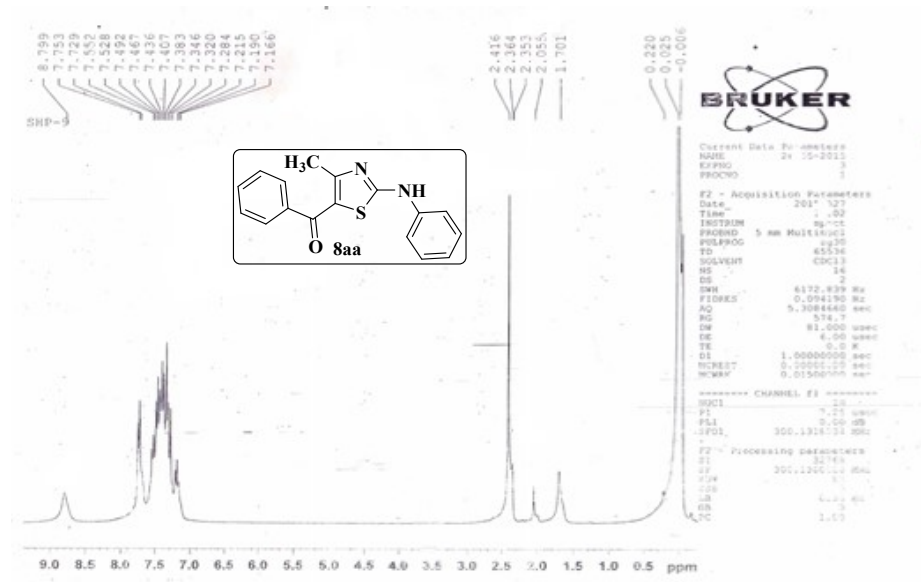

S1a: <sup>1</sup>H-NMR spectrum of compound 8aa

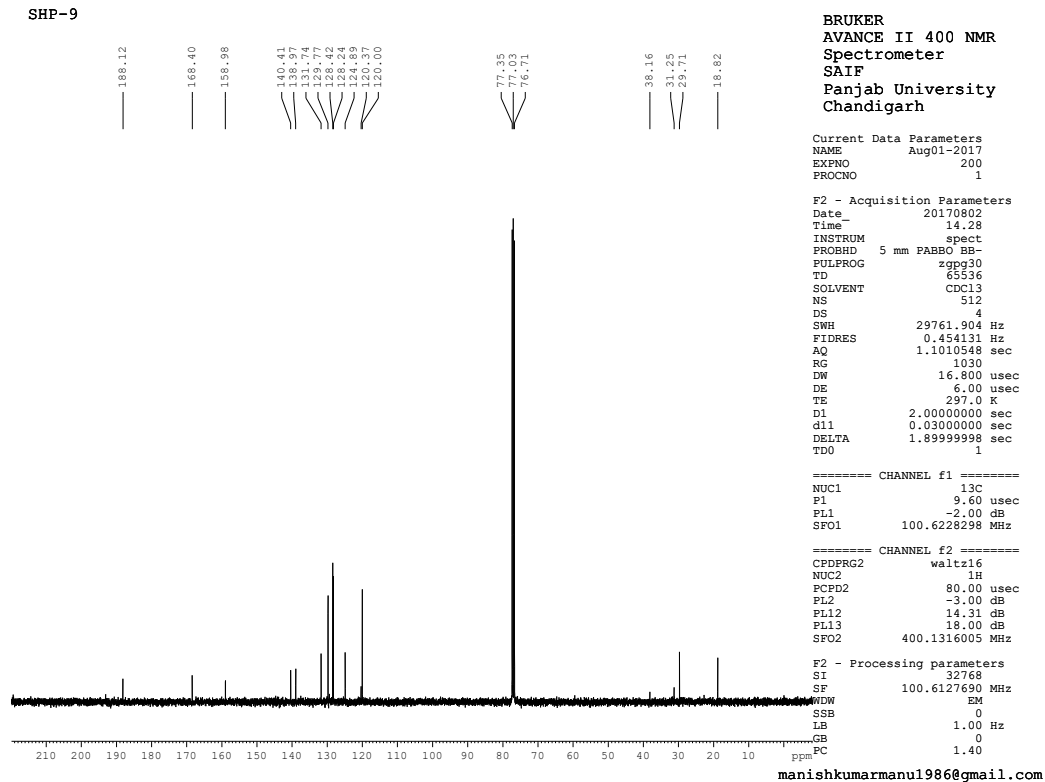

S1b: <sup>13</sup>C-NMR spectrum of compound 8aa

## 2. 2-(*N*-phenylamino)-4-methyl-5-(*p*-methylbenzoyl)thiazole (**8ab**)

SHP-69

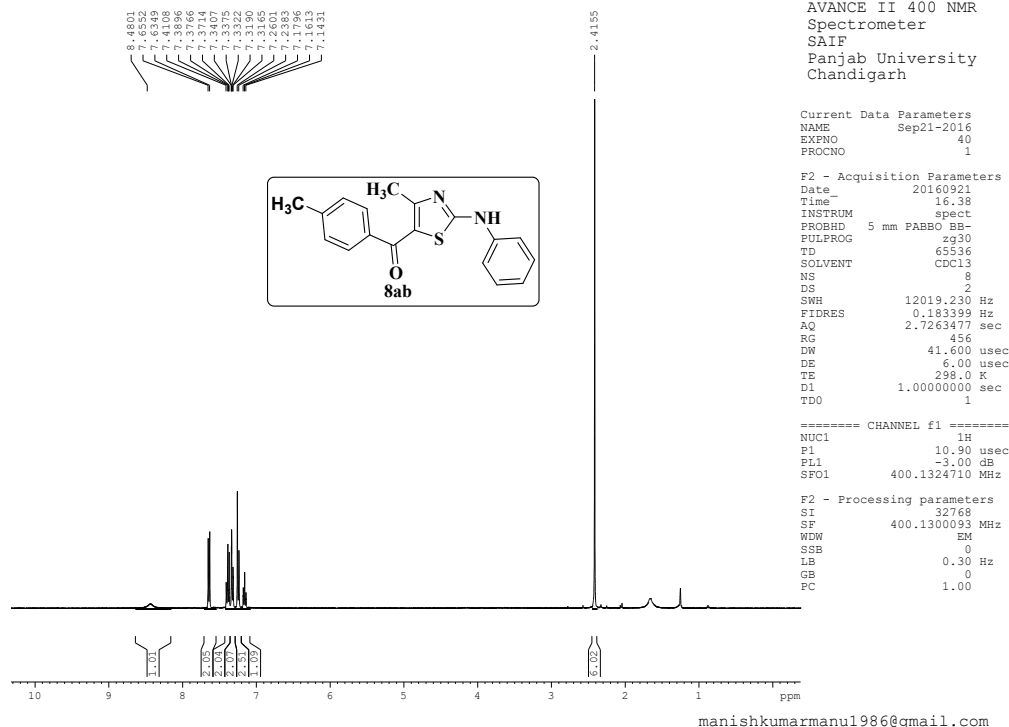

## S2a: <sup>1</sup>H-spectrum of compound **8ab**

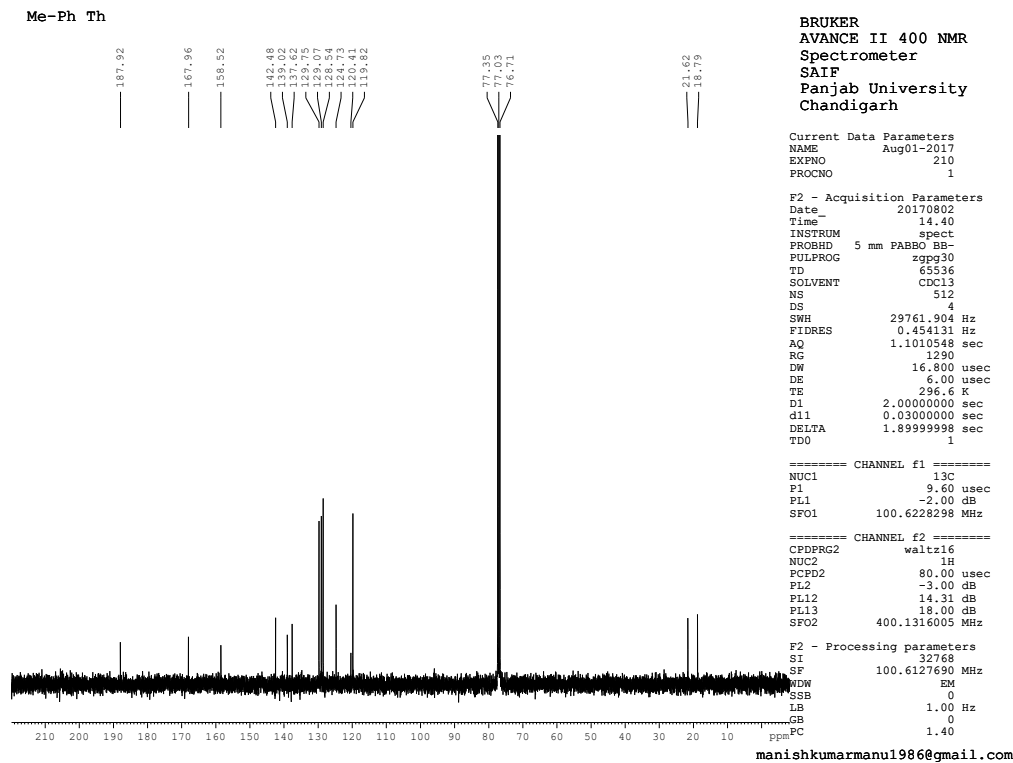

## S2b: <sup>13</sup>C-spectrum of compound **8ab**

### 3. 2-(*N*-phenylamino)-4-methyl-5-(*p*-methoxybenzoyl)thiazole (**8ac**)

Me-Ph-Th

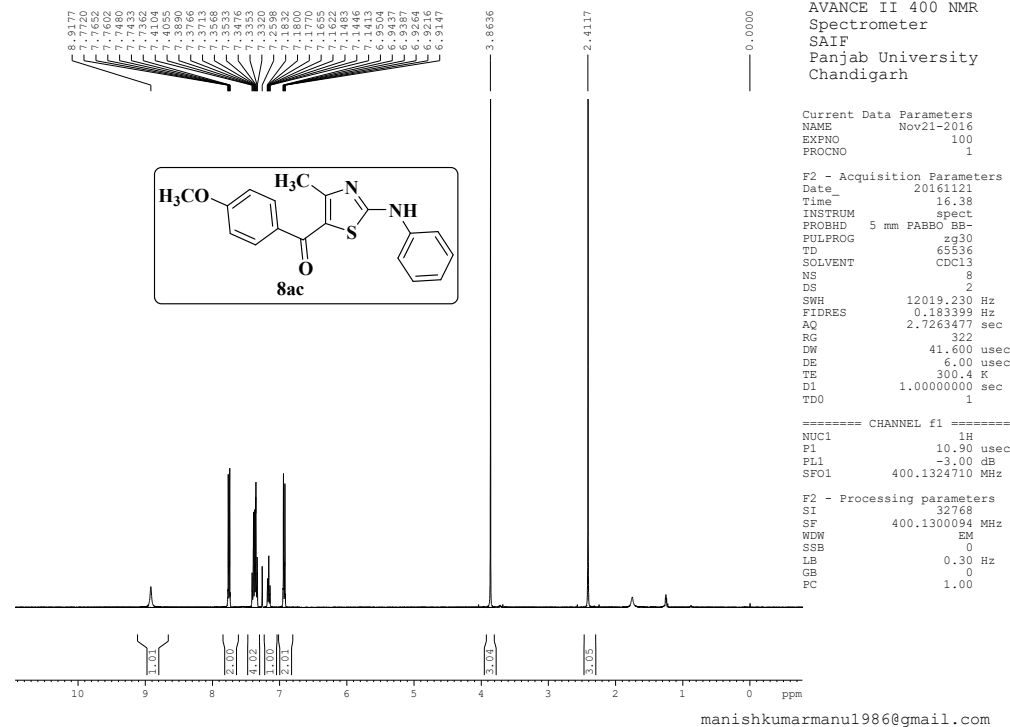

### S3a: <sup>1</sup>H-spectrum of compound **10ac**

OMe-Ph Th

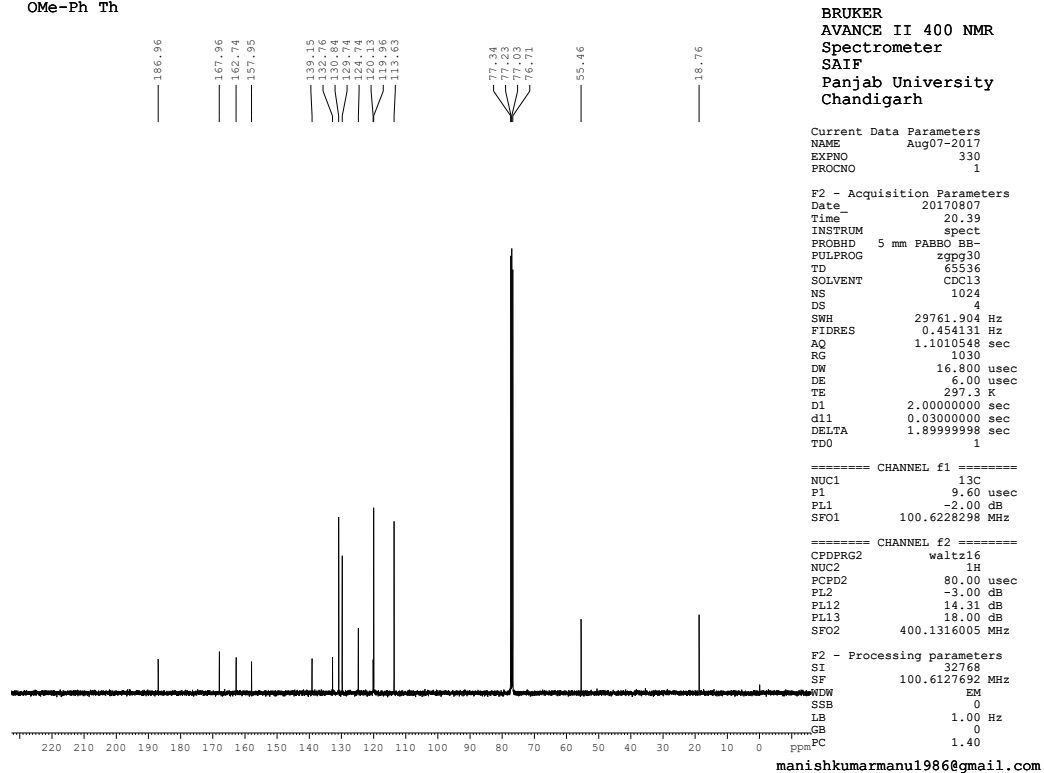

### S3b: <sup>13</sup>C-spectrum of compound **8ac**

#### 4. 2-(*N*-phenylamino)-4-methyl-5-(2-thienoyl) thiazole (8ad)

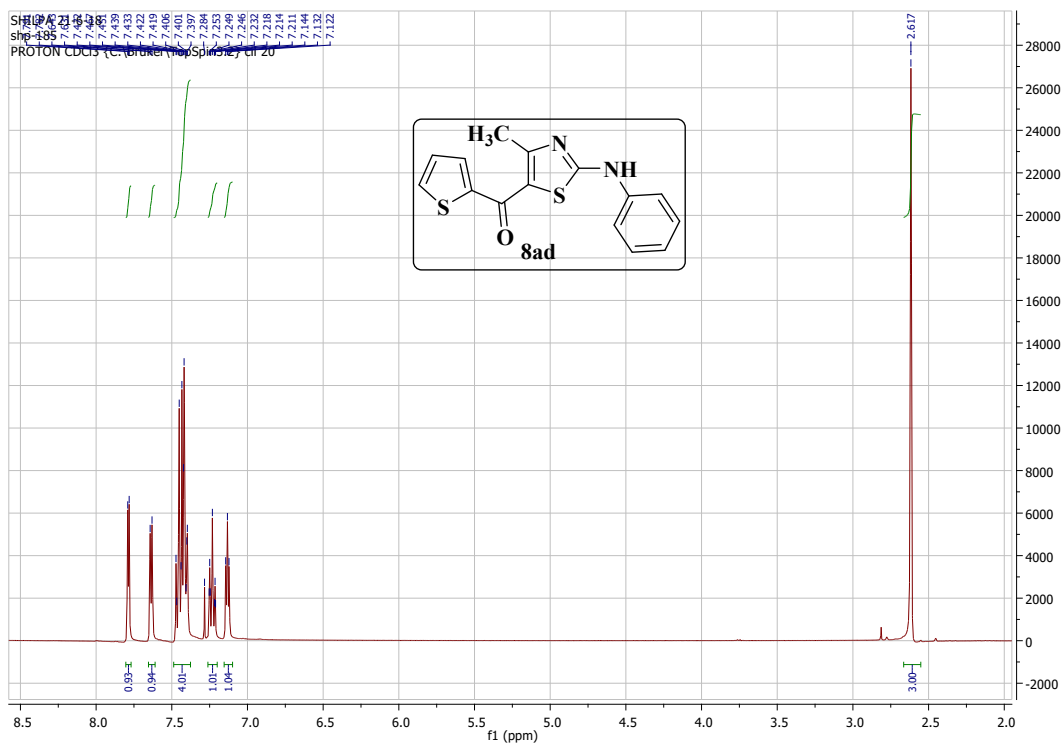

S4a: <sup>1</sup>H-spectrum of compound 8ad

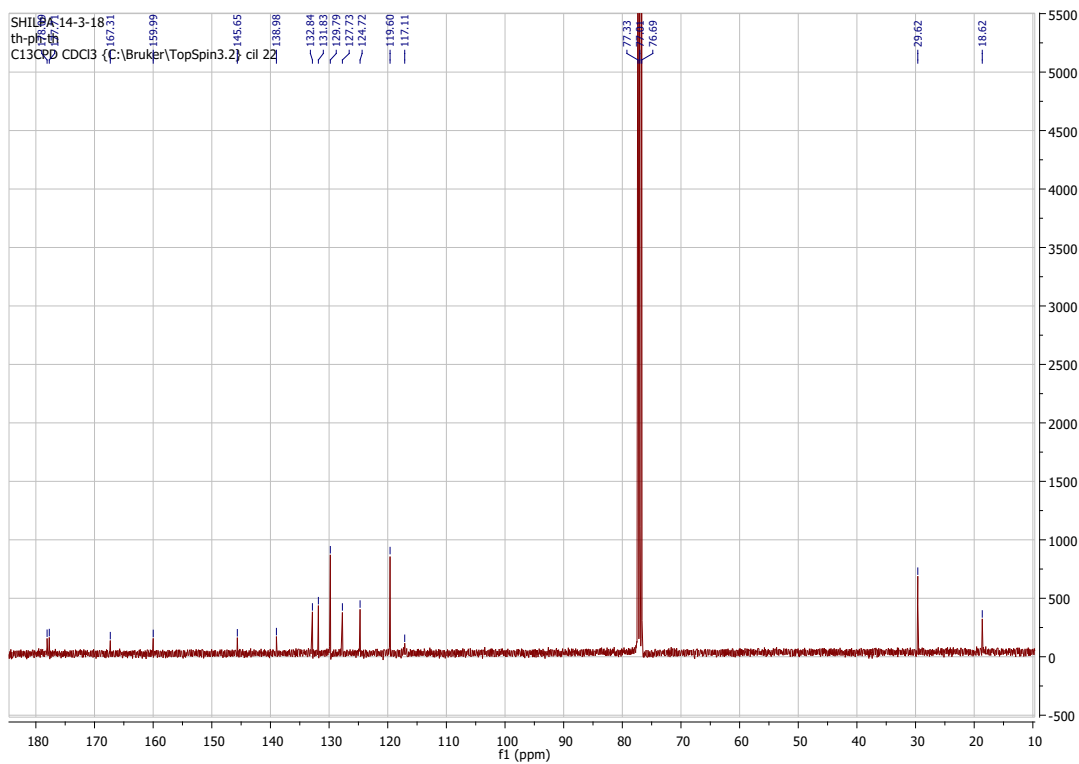

S4b: <sup>13</sup>C-spectrum of compound 8ad

### 5. 2-(*N*-(*p*-chlorophenyl)amino)-4-methyl-5-(2-thienoyl)thiazole (8bd)

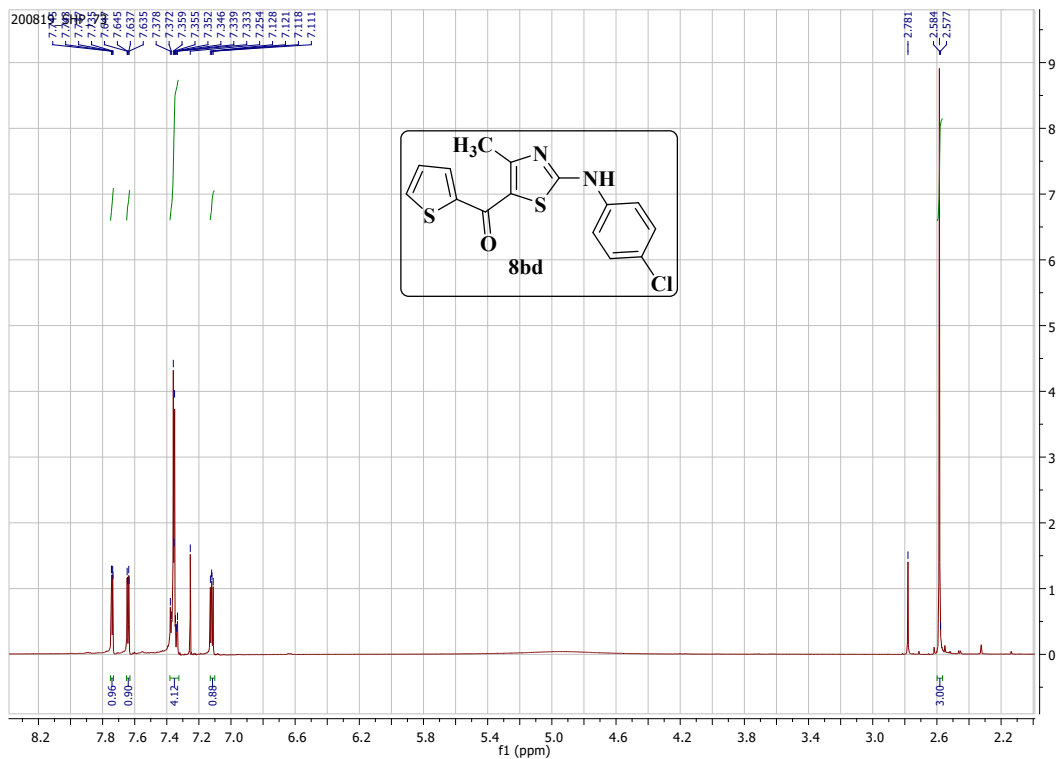

S5a: <sup>1</sup>H-NMR spectrum of compound 8bd

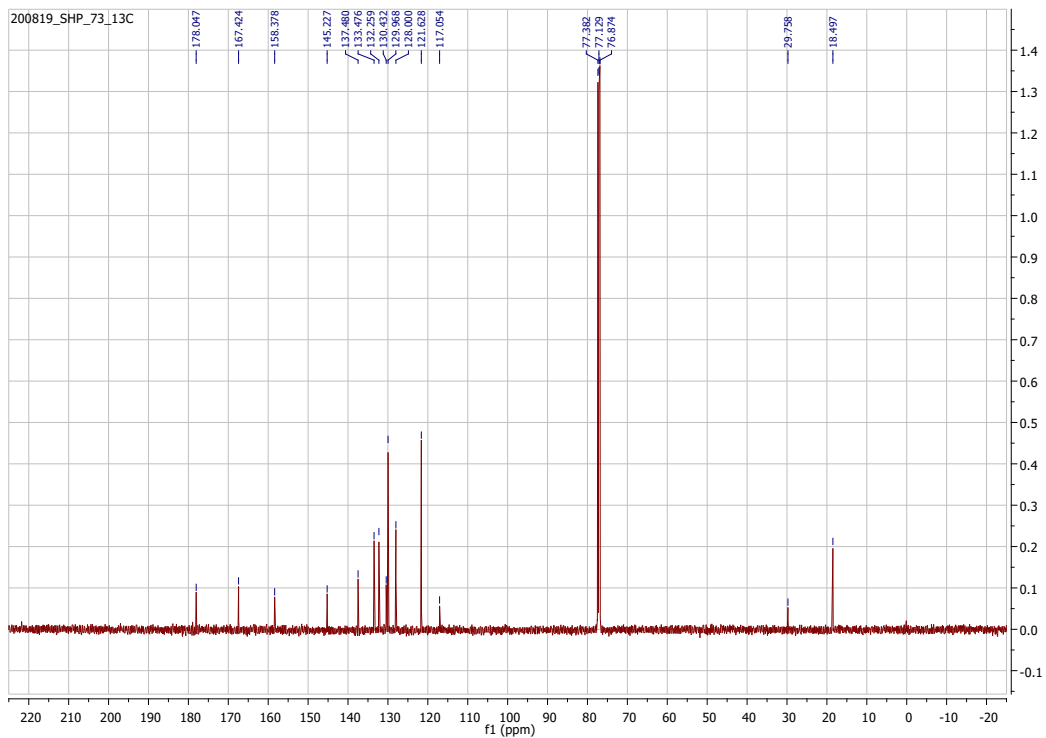

S5b: <sup>13</sup>C-NMR spectrum of compound 8bd



## 6. 2-(*N*-(*p*-methylphenyl)amino)-4-methyl-5-(*p*-methoxybenzoyl)thiazole (8dc)

Ome-Me Th

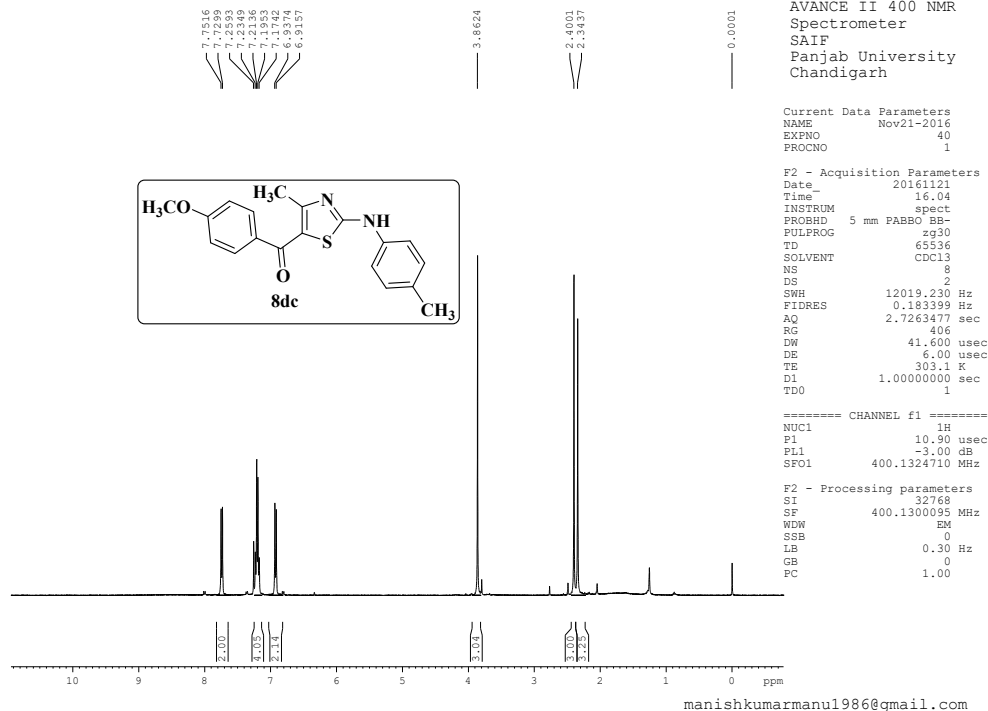

### S6a: <sup>1</sup>H-spectrum of compound 8dc

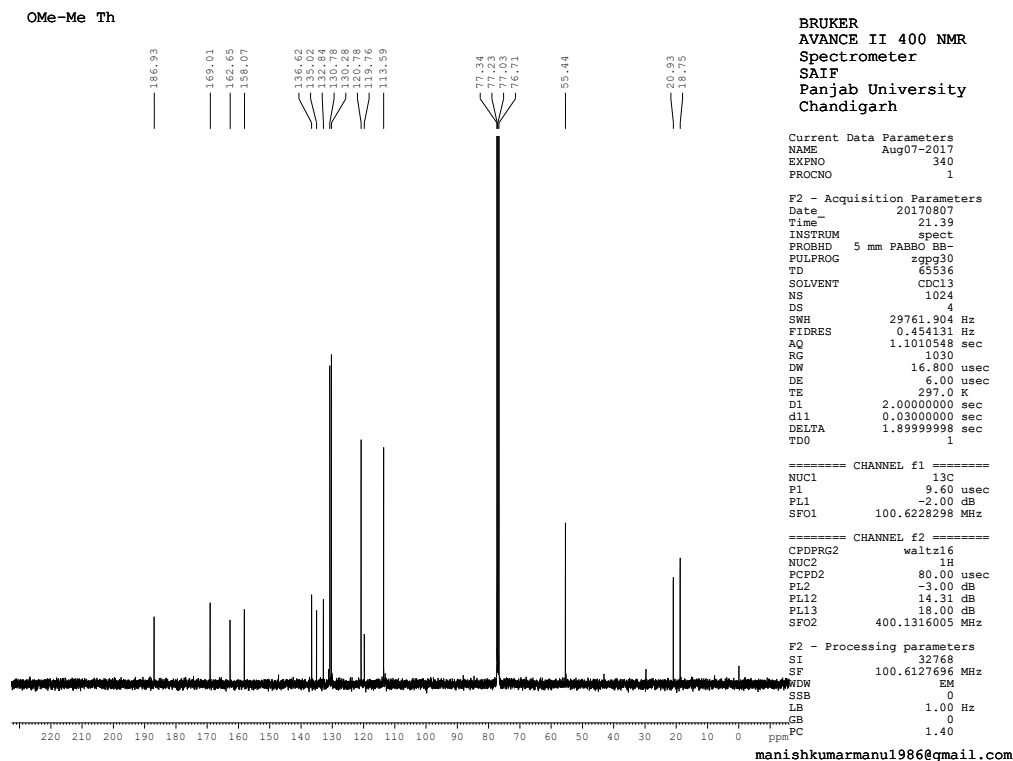

### S6b: <sup>13</sup>C-spectrum of compound 8dc

## 7. 2-(*N*-(*p*-methylphenyl)amino)-4-methyl-5-(2-thienoyl)thiazole (8dd)

Th-Me Th

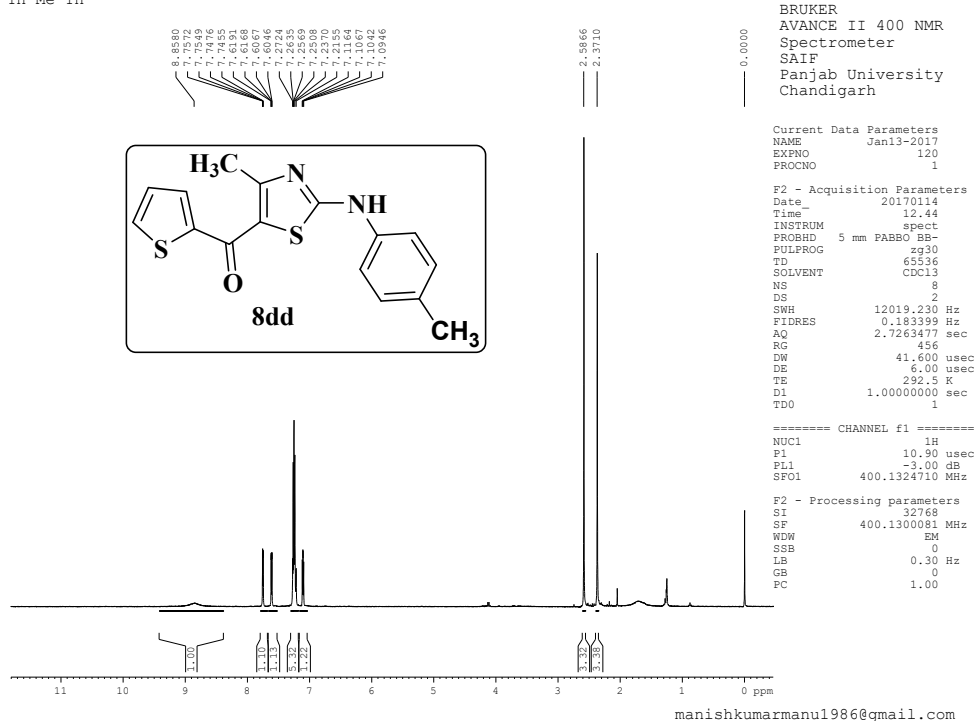

## S7a: <sup>1</sup>H-spectrum of compound 8dd

Th-Me Th

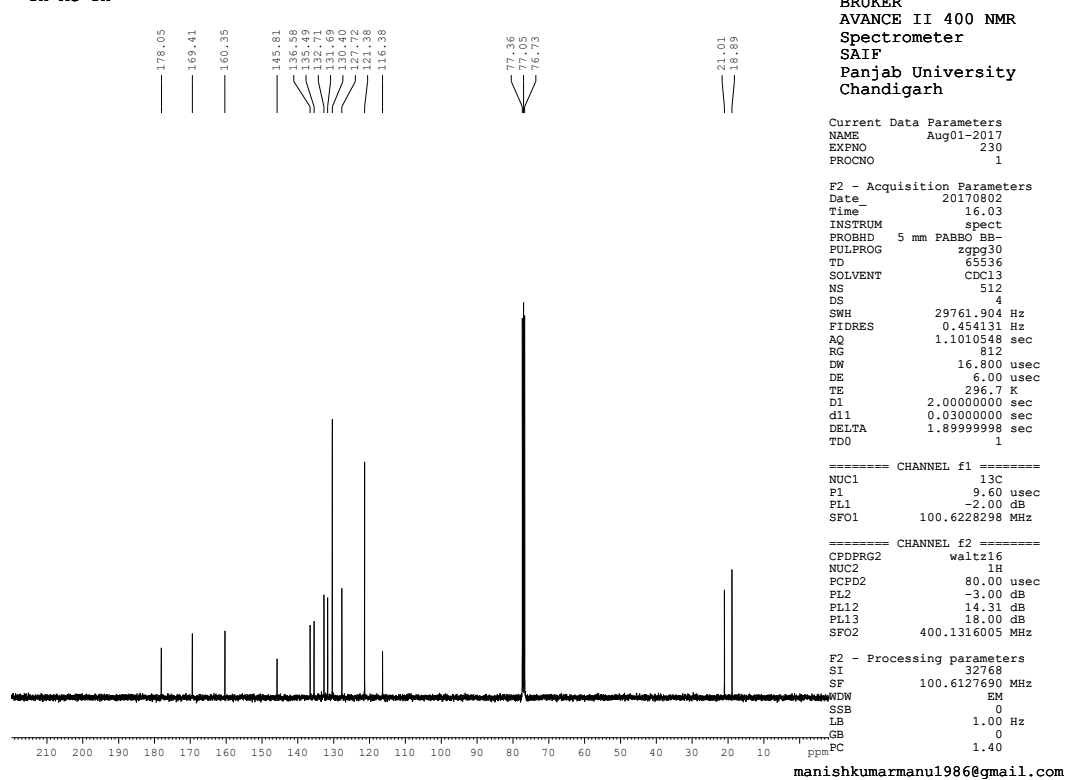

## S7b: <sup>13</sup>C-spectrum of compound 8dd

## 8. 2-(*N*-(*p*-methylbenzyl)amino)-4-methyl-5-(*p*-chlorobenzoyl)thiazole (8de)

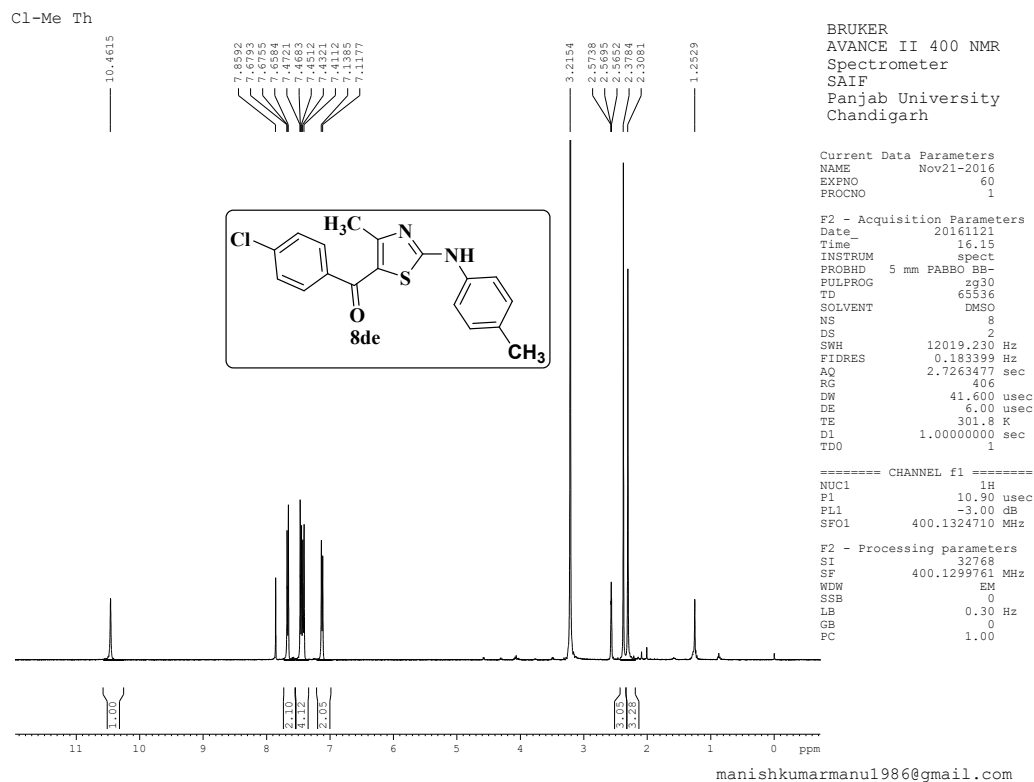

## S8a: <sup>1</sup>H-spectrum of compound 8de

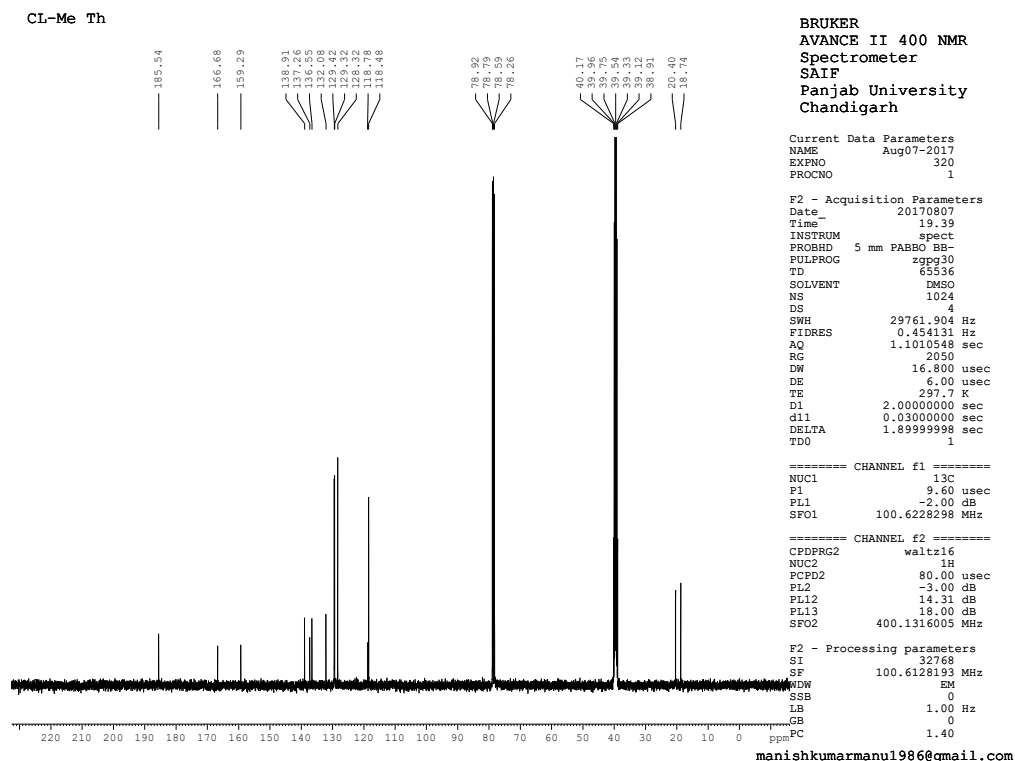

## S8b: <sup>13</sup>C-spectrum of compound 8de

## 9. 2-(*N*-(*p*-nitrophenyl)amino)-4-methyl-5-(*p*-methylbenzoyl)thiazole (**8fb**)

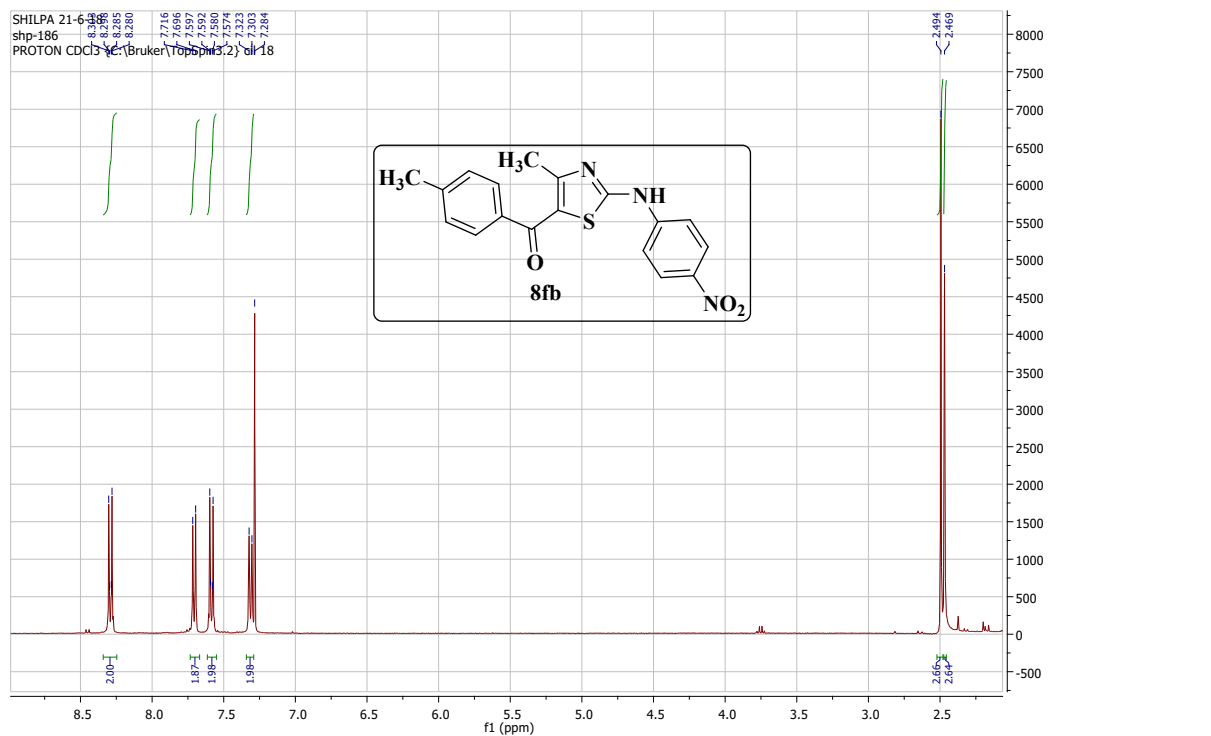

### S9a: <sup>1</sup>H-NMR spectrum of compound **8fb**

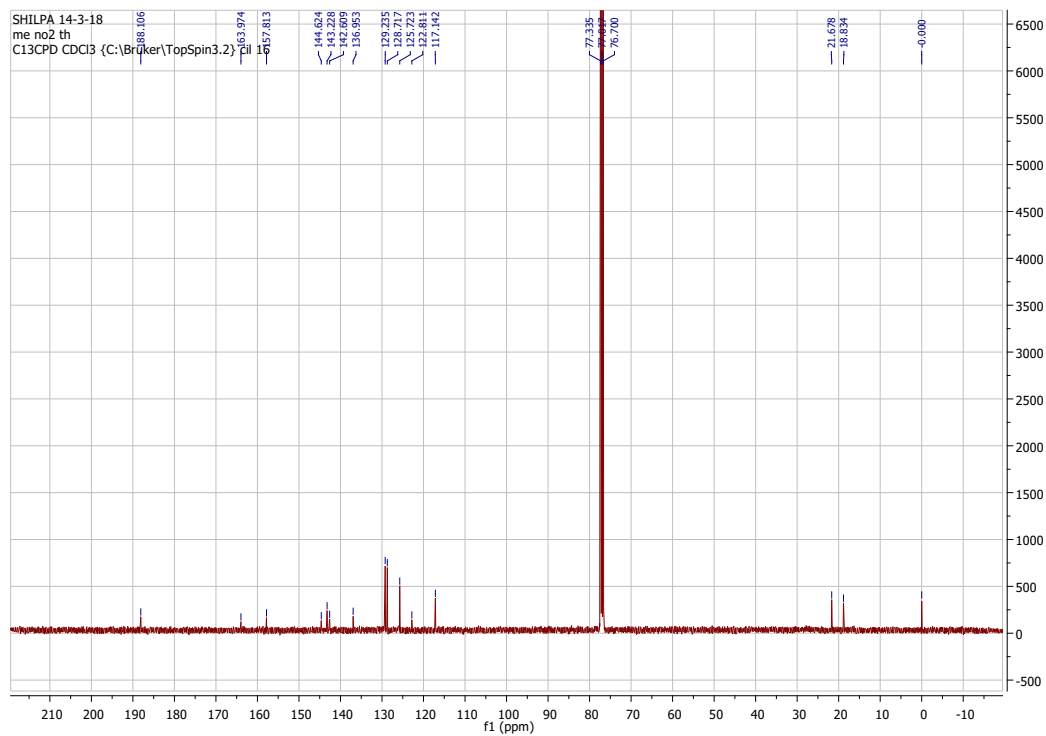

### S9b: <sup>13</sup>C-NMR spectrum of compound **8fb**

# 10. 2-(*N*-(*p*-nitrophenyl)amino)-4-methyl-5-(*p*-methoxybenzoyl)thiazole (8fc)

1

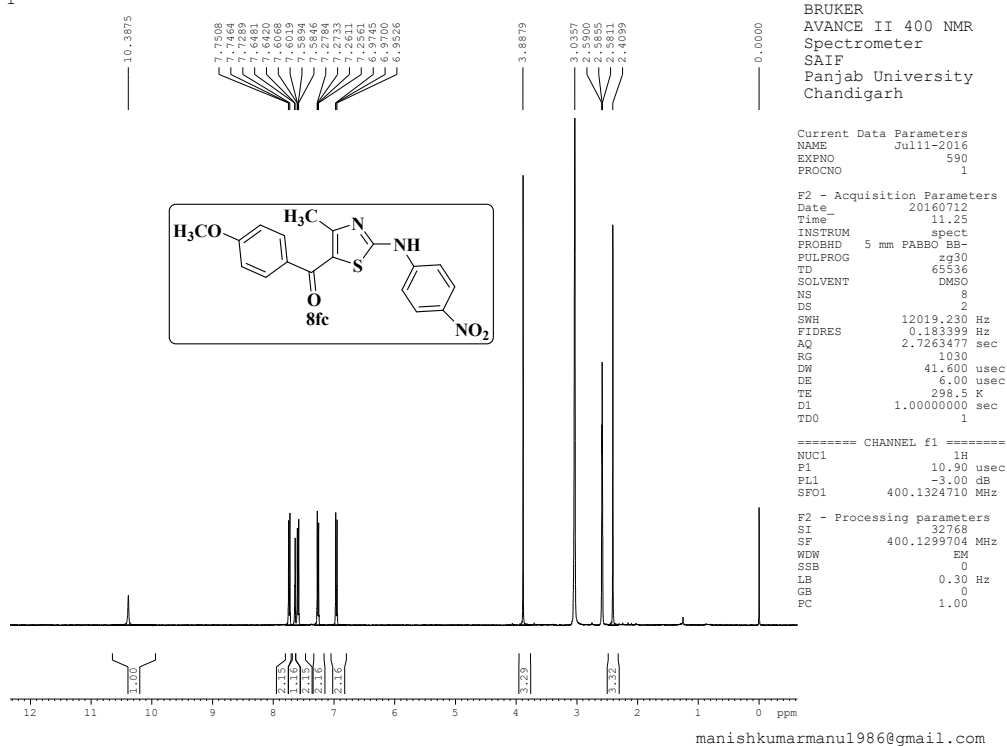

S10a: <sup>1</sup>H-NMR spectrum of compound 8fc

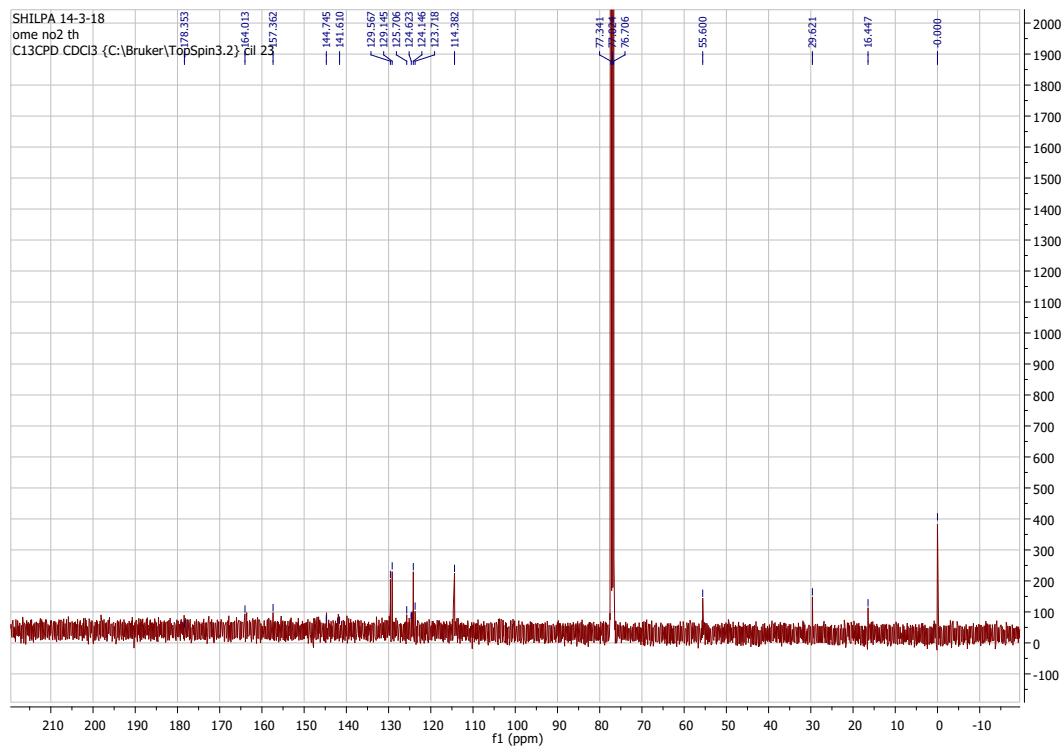

S10b: <sup>13</sup>C-NMR spectrum of compound 8fc

# 11. 2-(*N*-benzoylimino)-3-*N*-(*p*-chlorophenyl)-4-methylthiazole (12ba)

1

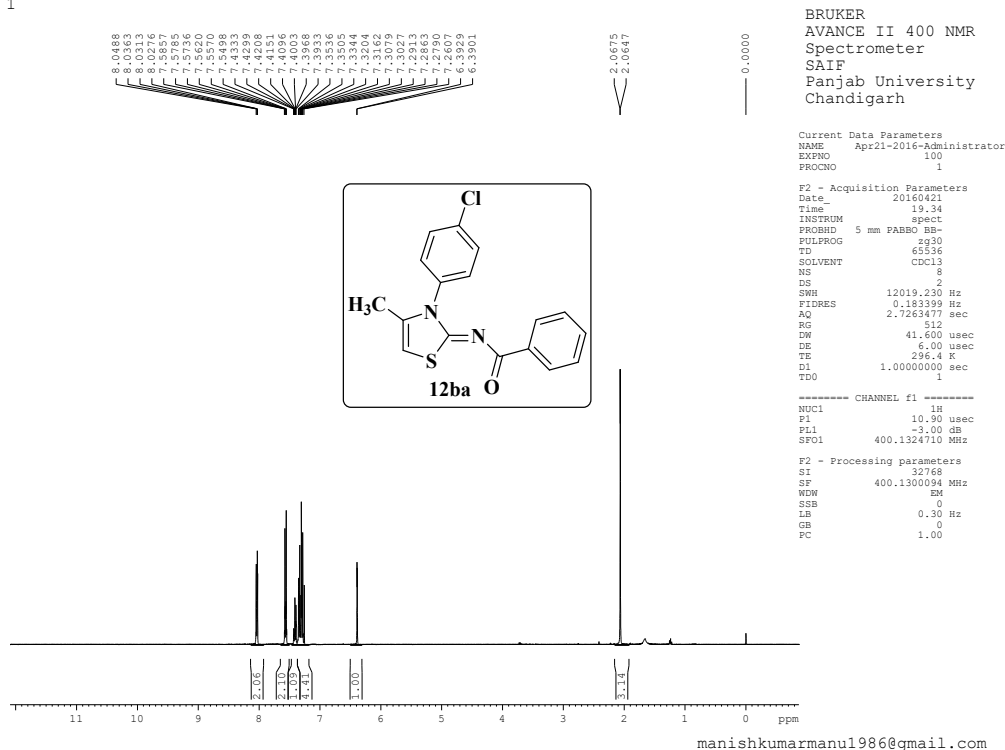

manishkumarmanu1986@gmail.com

## S11a: <sup>1</sup>H-NMR spectrum of compound 12ba

Ph-Cl Th

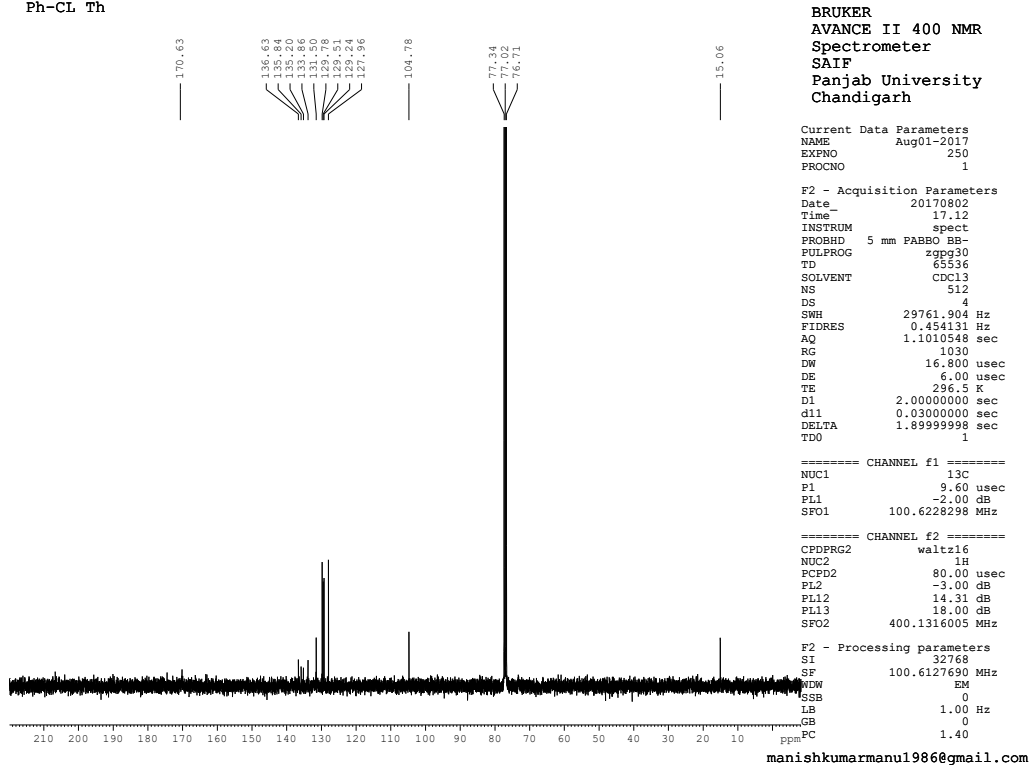

manishkumarmanu1986@gmail.com

## S11b: <sup>13</sup>C-NMR spectrum of compound 12ba

## 12. 2-(*N*-(*p*-chlorobenzoyl)imino)-3-*N*-(*p*-chlorophenyl)-4-methylthiazole (12be)

CL-CL Th

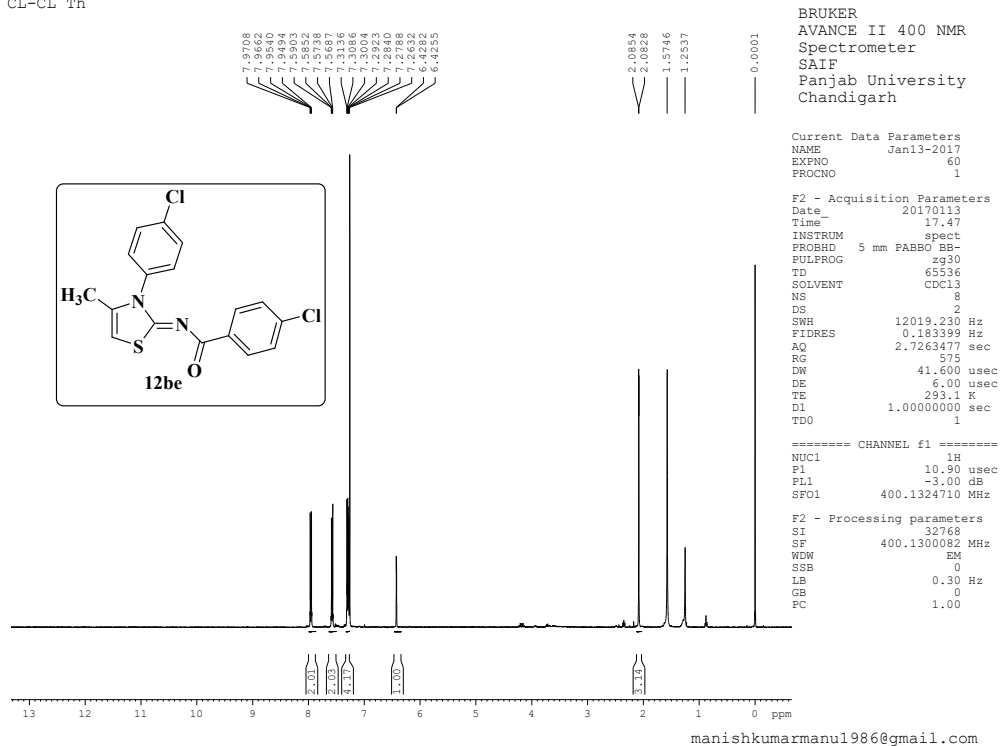

## S12a: <sup>1</sup>H-spectrum of compound 12be

CL-CL Th

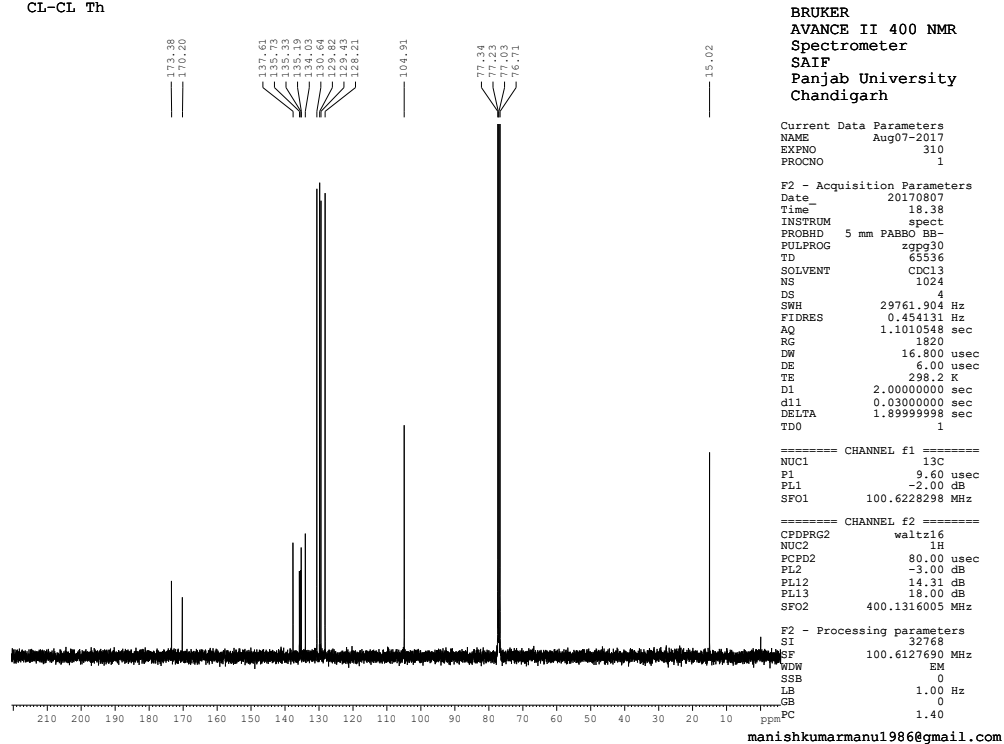

## S12b: <sup>13</sup>C-spectrum of compound 12be

13. 2-(*N*-*p*-methoxybenzoylimino)-3-*N*-(*o*-chlorophenyl)-4-methylthiazole (12cc)

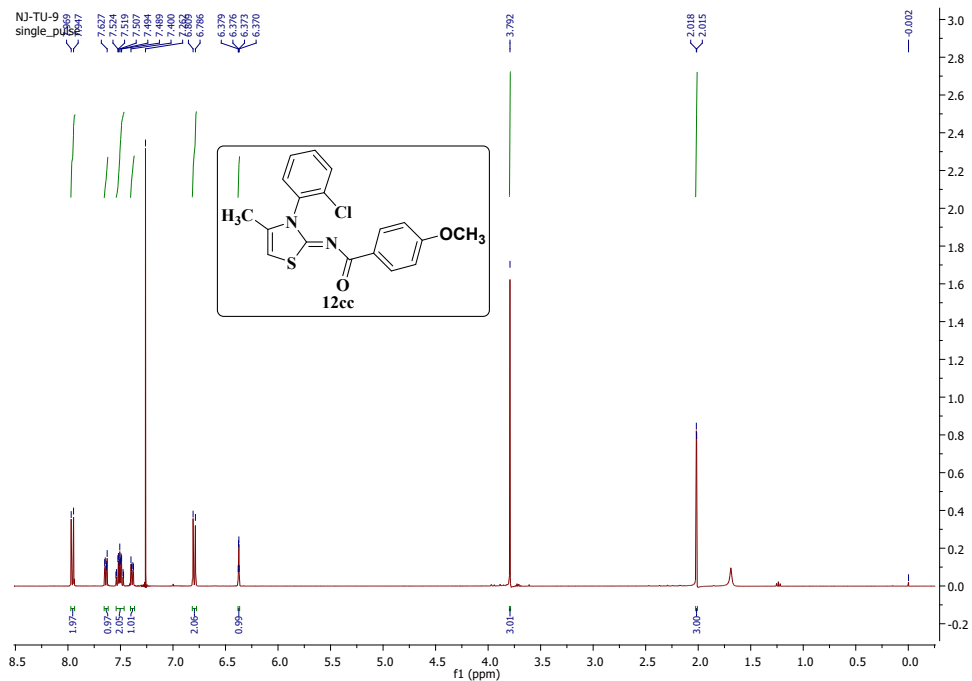

S13a: <sup>1</sup>H-NMR spectrum of compound 12cc

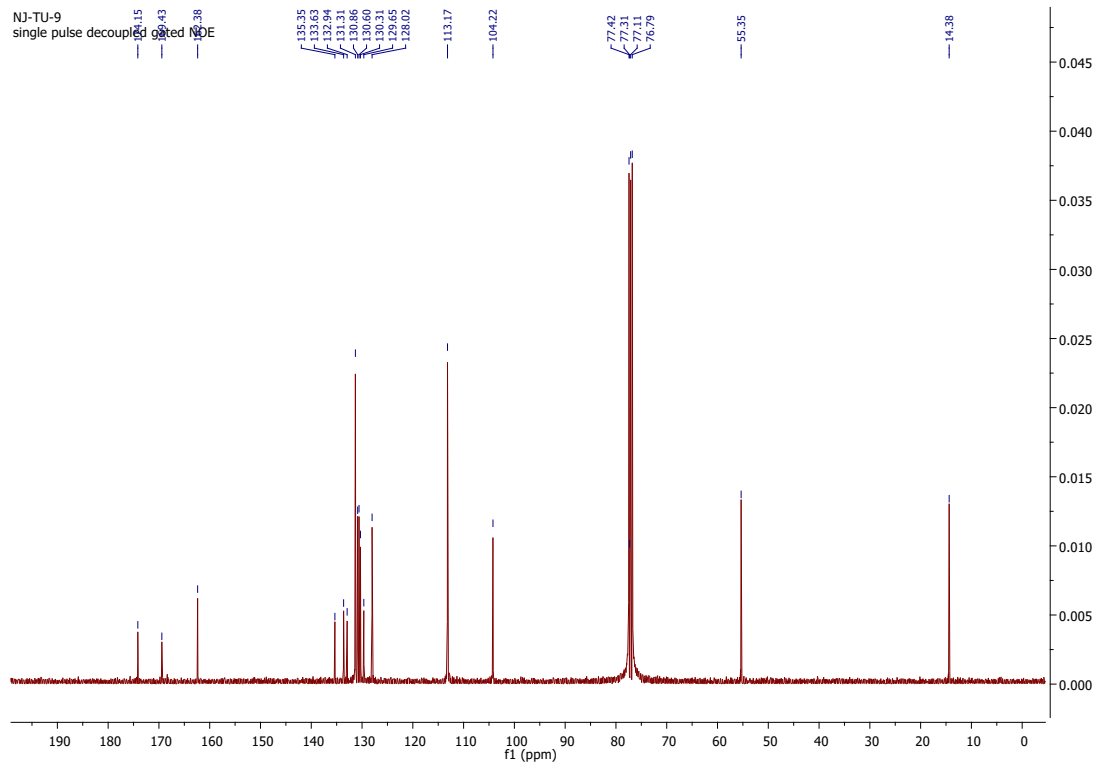

S13b: <sup>13</sup>C-NMR spectrum of compound 12cc

14. 2-(*N*-benzoylimino)-3-*N*-(*p*-methylphenyl)-4-methylthiazole (12da)



SHP-61

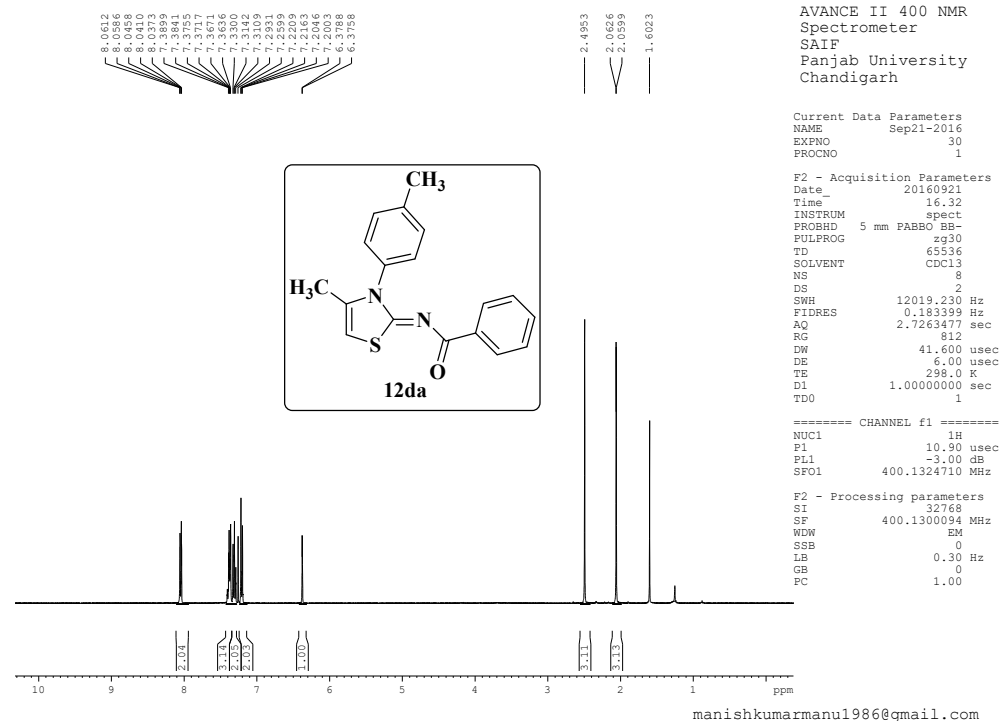

S14a: <sup>1</sup>H-NMR spectrum of compound 12da

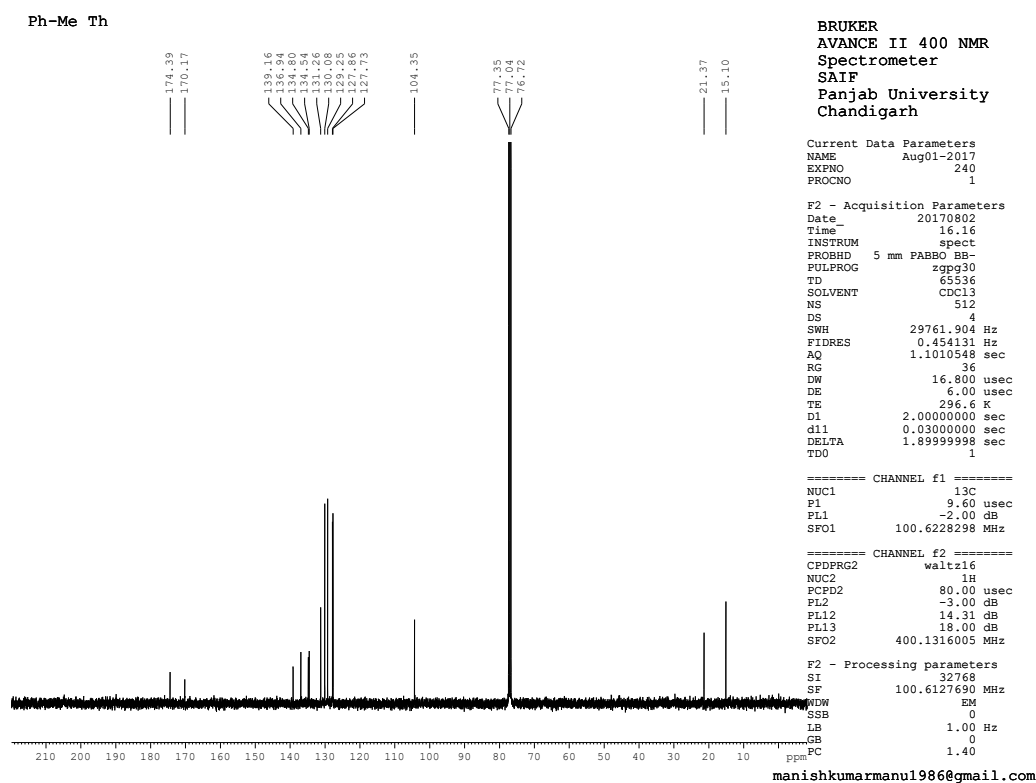

S14b: <sup>13</sup>C-NMR spectrum of compound 12da

### 15. 2-(*N*-(*p*-methylbenzoyl)imino)-3-*N*-(*p*-methylphenyl)-4-methylthiazole (12db)

Me-Me Th

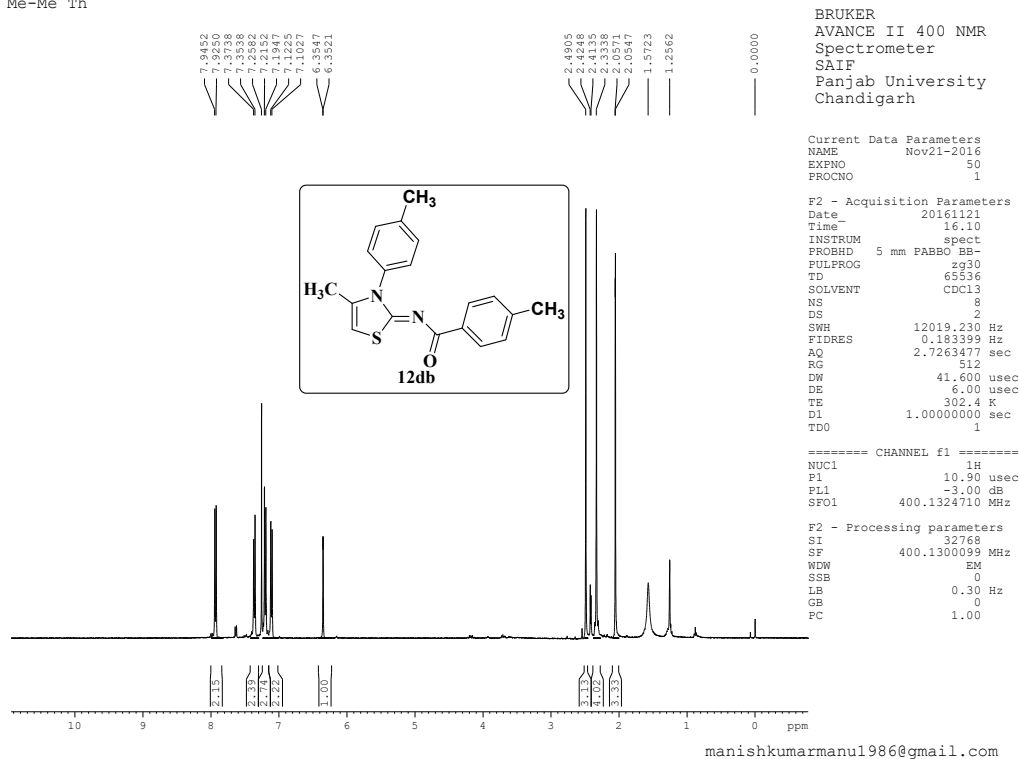

S15a: <sup>1</sup>H-NMR spectrum of compound 12db

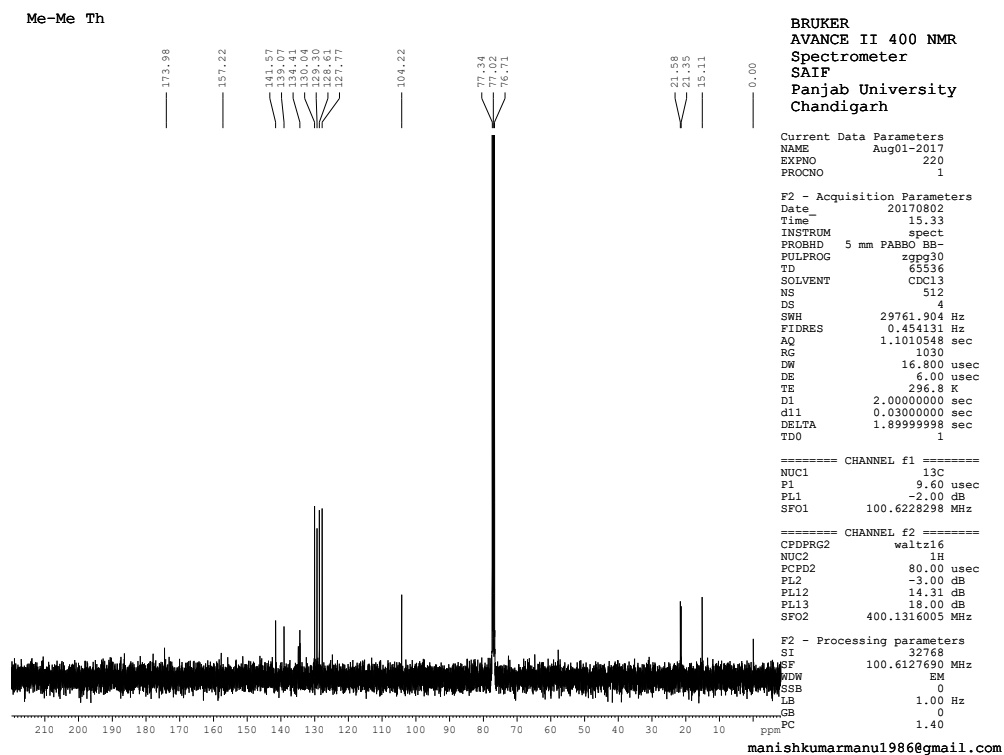

S15b: <sup>13</sup>C-NMR spectrum of compound 12db

# 16. 2-(*N*-benzoylimino)-3-*N*-(*p*-methoxyphenyl)-4-methylthiazole (12ea)

C-1

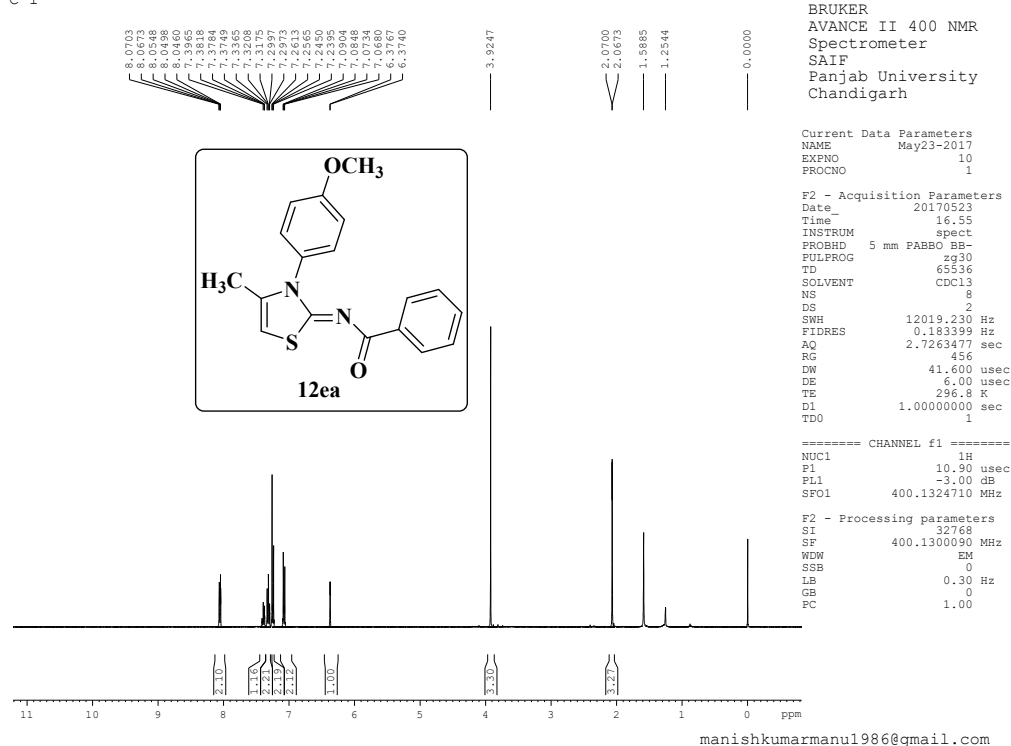

S16a: <sup>1</sup>H-NMR spectrum of compound 12ea

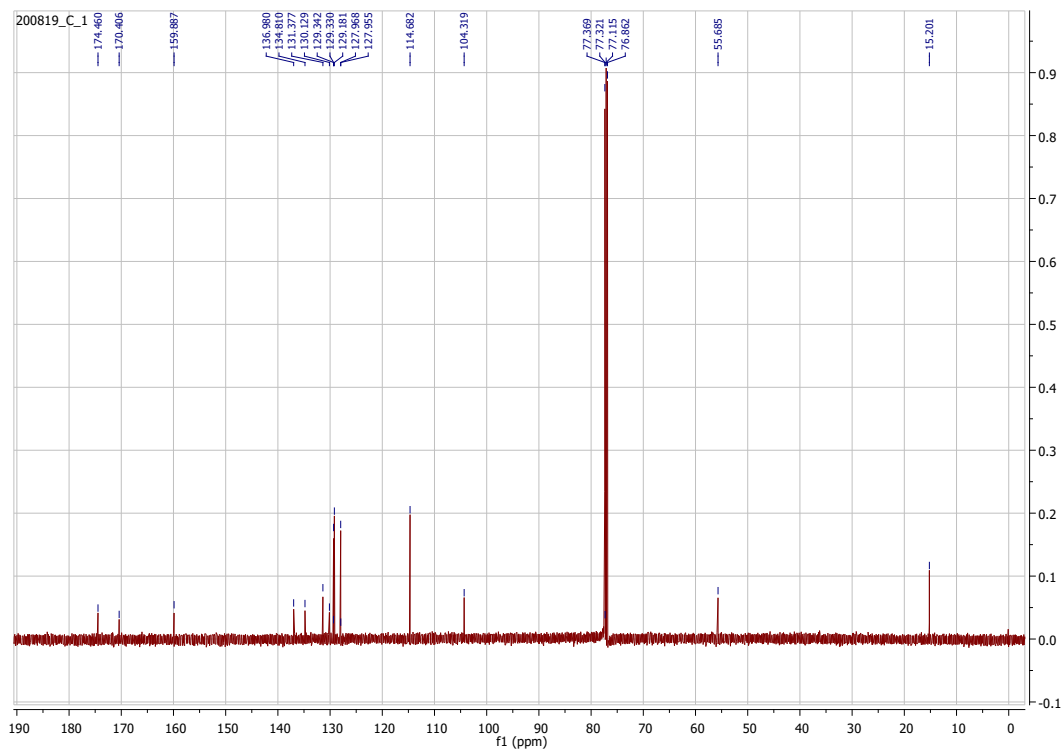

S16b: <sup>13</sup>C-NMR spectrum of compound 12ea

## 17. 2-(*N*-benzoylimino)-3-*N*-(*p*-nitrophenyl)-4-methylthiazole (12fa)

2

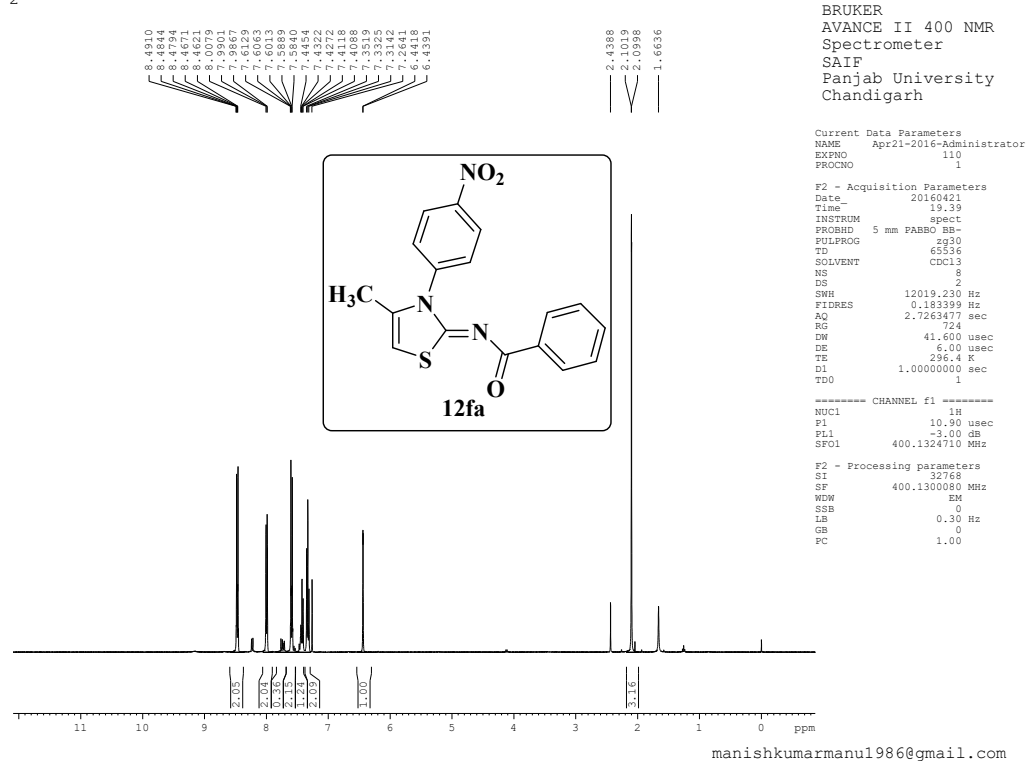

## S17a: <sup>1</sup>H-NMR spectrum of compound 12fa

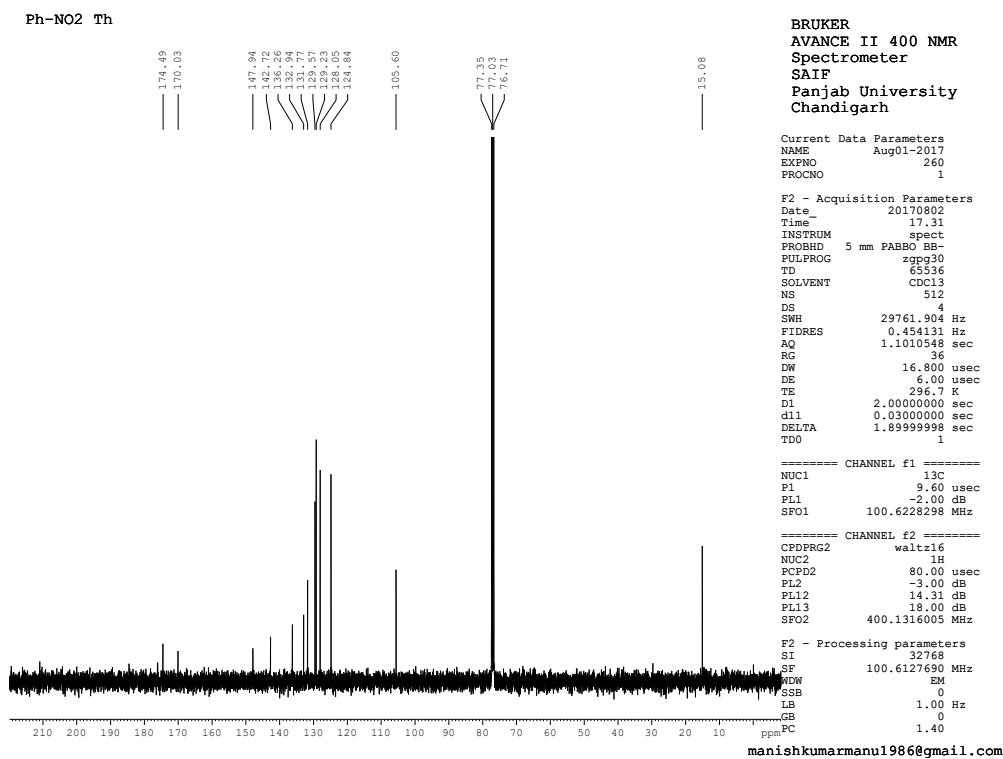

## S17b: <sup>13</sup>C-NMR spectrum of compound 12fa

# 18. 2-(*N*-(*p*-chlorophenyl)amino)-4-methyl-5-(*p*-methoxybenzoyl)thiazole (8bc)

SHP-53a

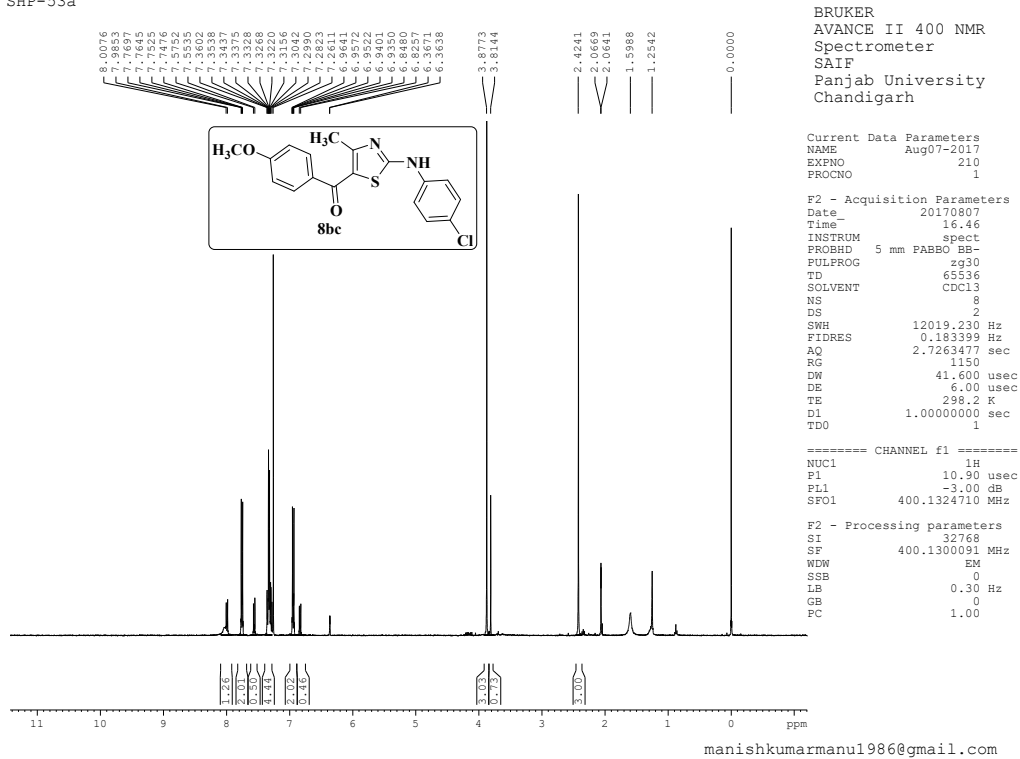

## S18a: <sup>1</sup>H-spectrum of compound 8bc

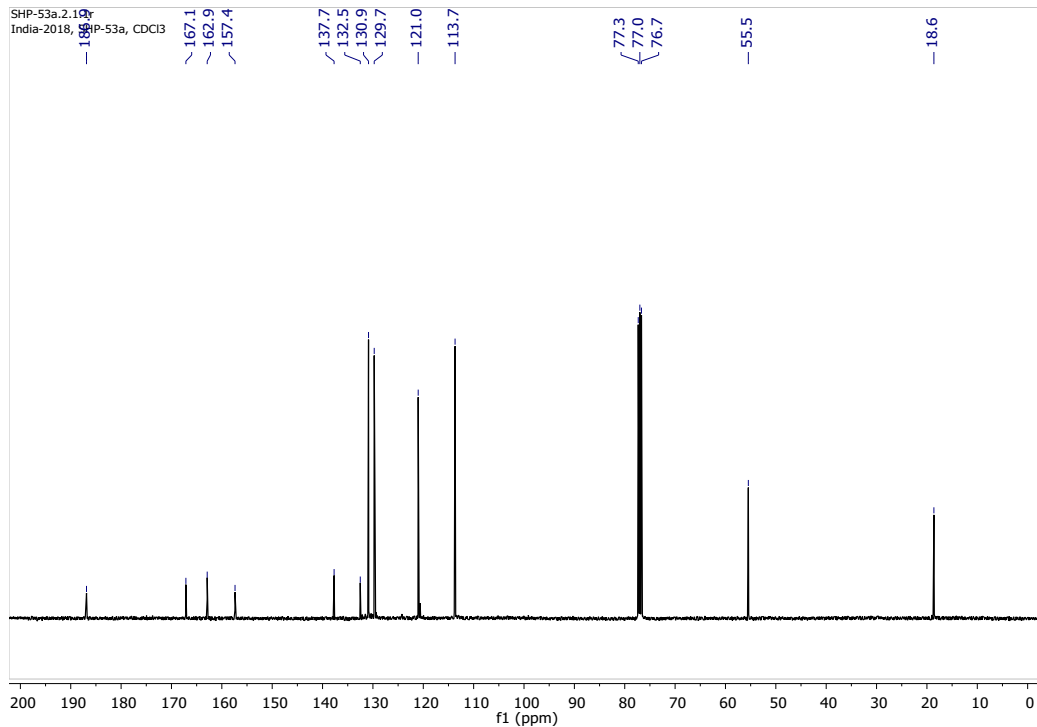

## S18b: <sup>13</sup>C-spectrum of compound 8bc

# 19. 2-(*N*-(*p*-methoxybenzoyl)imino)-3-*N*-(*p*-chlorophenyl)-4-methylthiazole (12bc)

SHP-53b

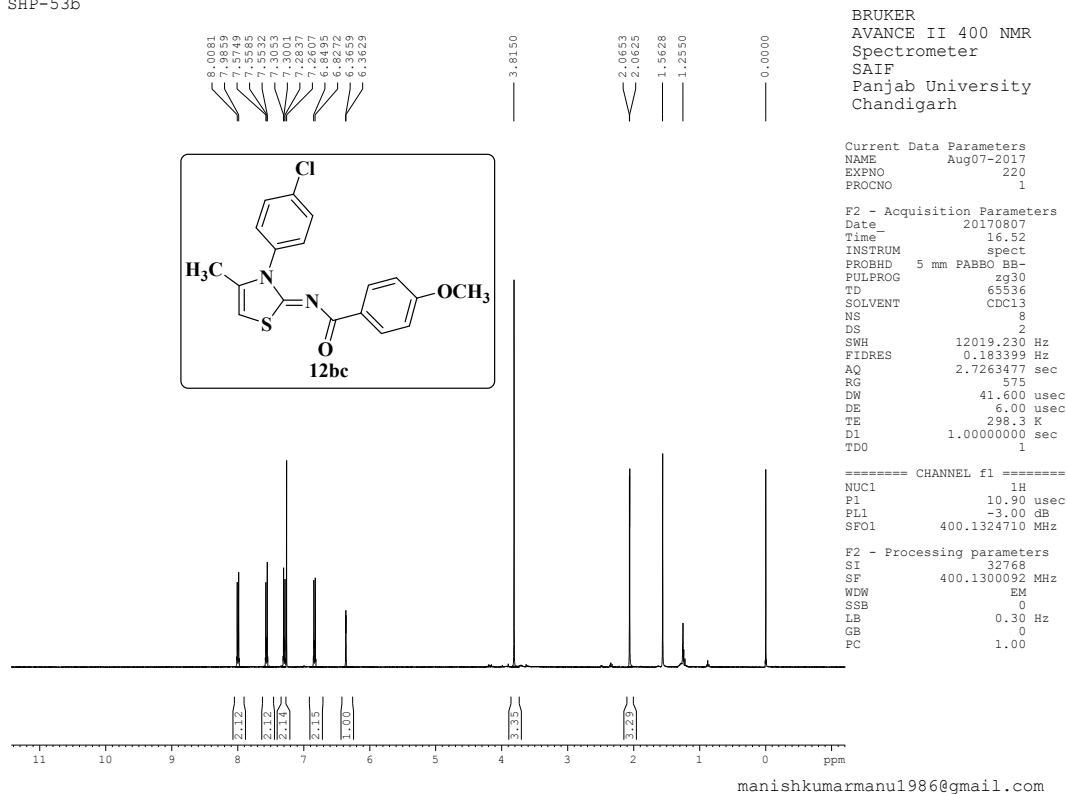

## S19a: <sup>1</sup>H-spectrum of compound 12bc

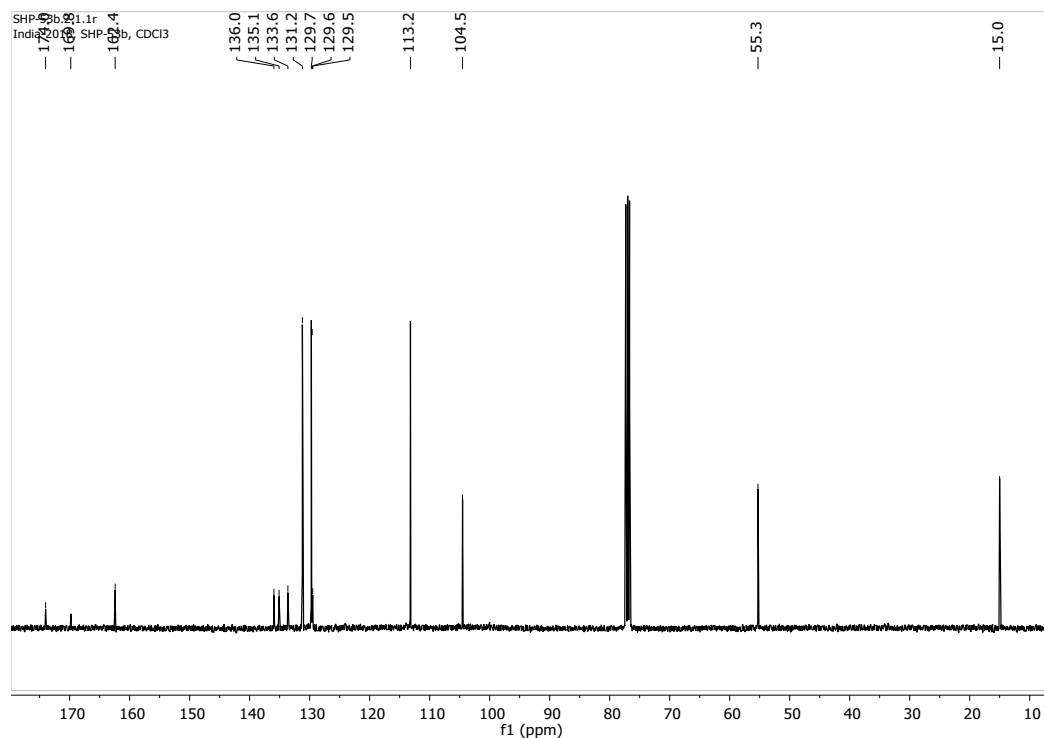

## S19b: <sup>13</sup>C-spectrum of compound 12bc

## 20. 2-(*N*-(*p*-methoxyphenyl)amino)-4-methyl-5-(2-thienoyl)thiazole (8ed)

SHP-71a

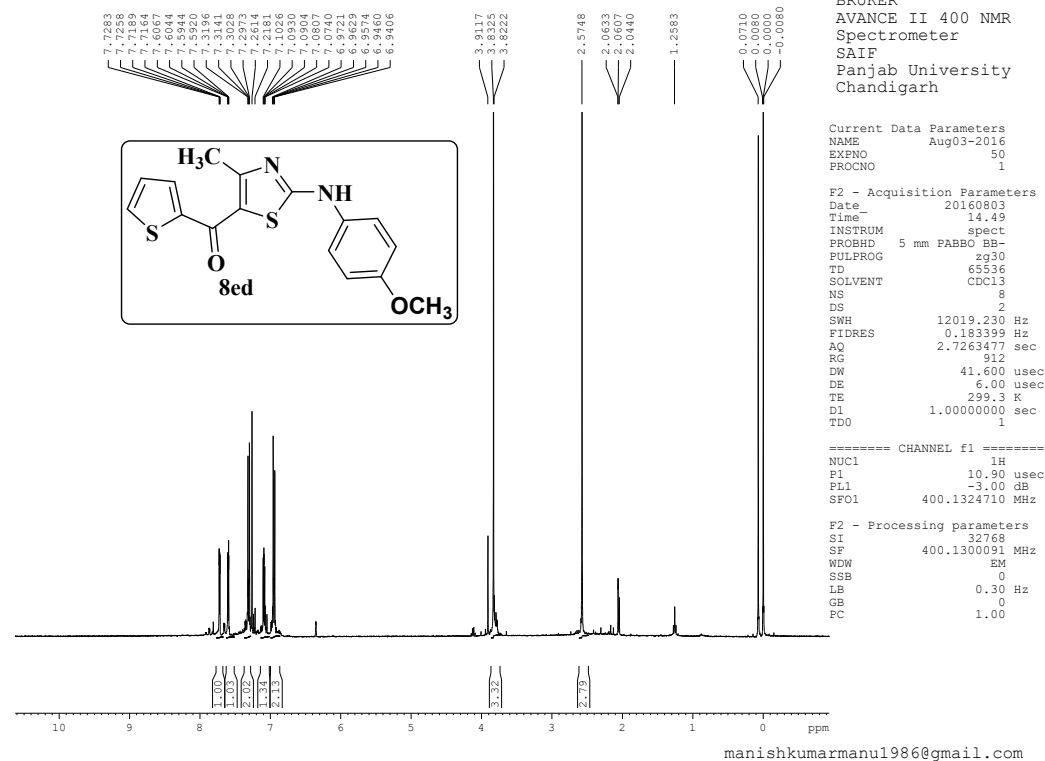

### S20a: <sup>1</sup>H-spectrum of compound 8ed

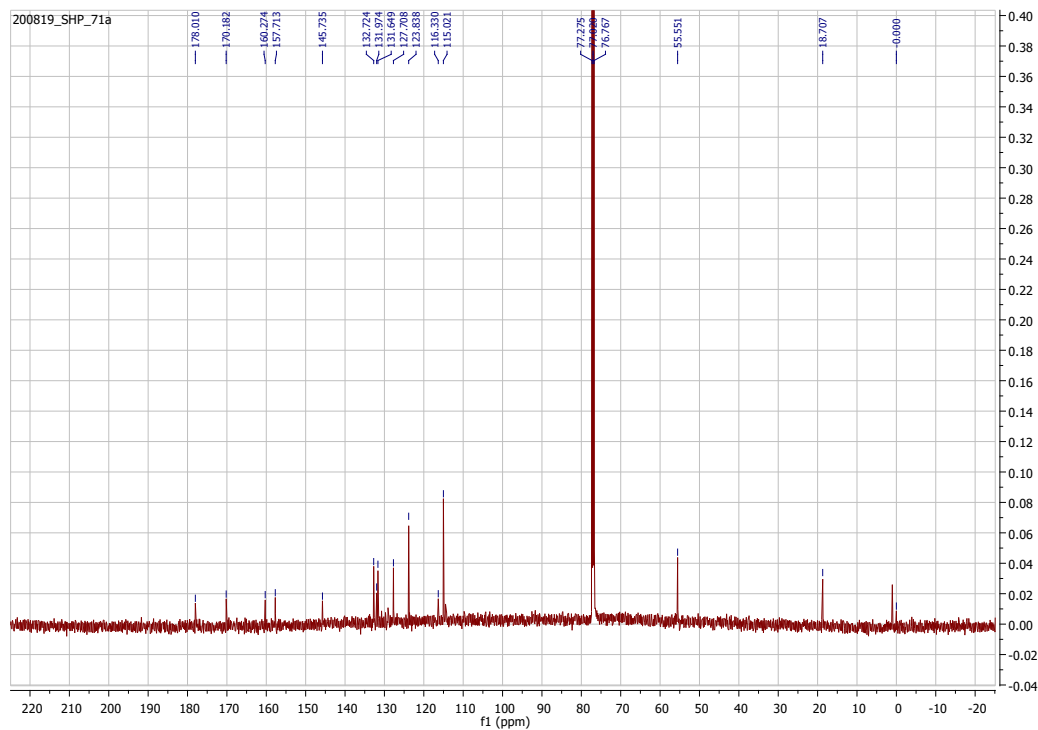

### S20b: <sup>13</sup>C-spectrum of compound 8ed





## 22. 2-(*N*-(*p*-nitrophenyl)amino)-4-methyl-5-(2-thienoyl)thiazole (8fd)

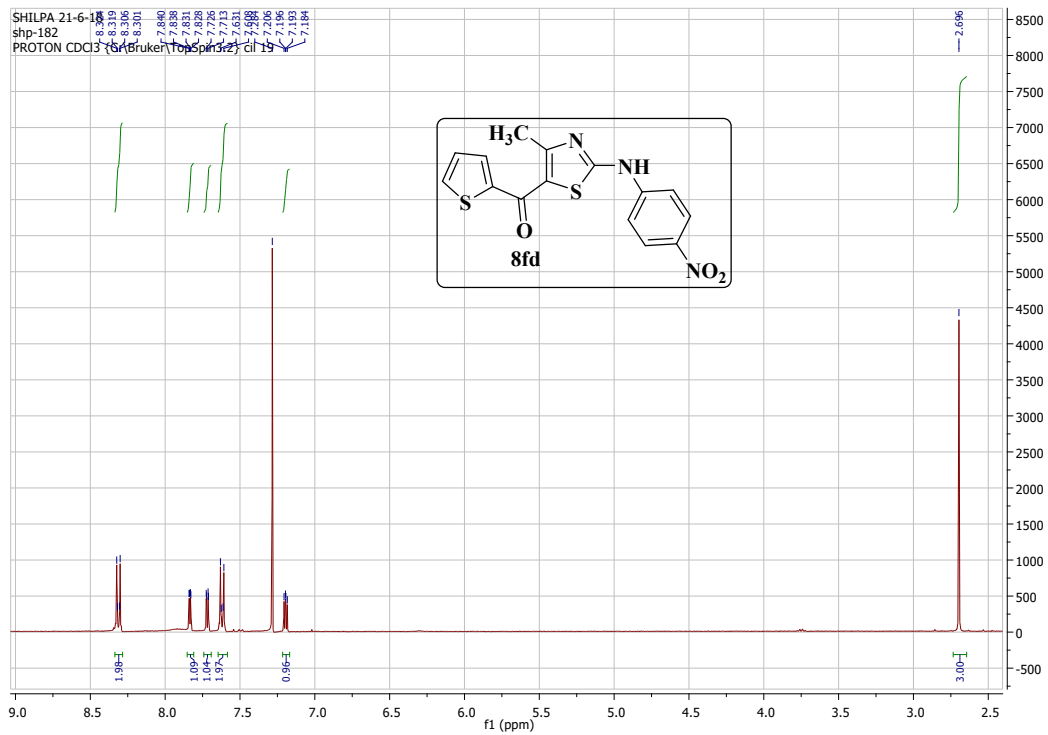

S22: <sup>1</sup>H-NMR spectrum of compound **8fd**

### 23. 2-(*N*-(2-thienoyl)imino)-3-*N*-(*p*-nitrophenyl)-4-methylthiazole (12fd)

SHP-70b

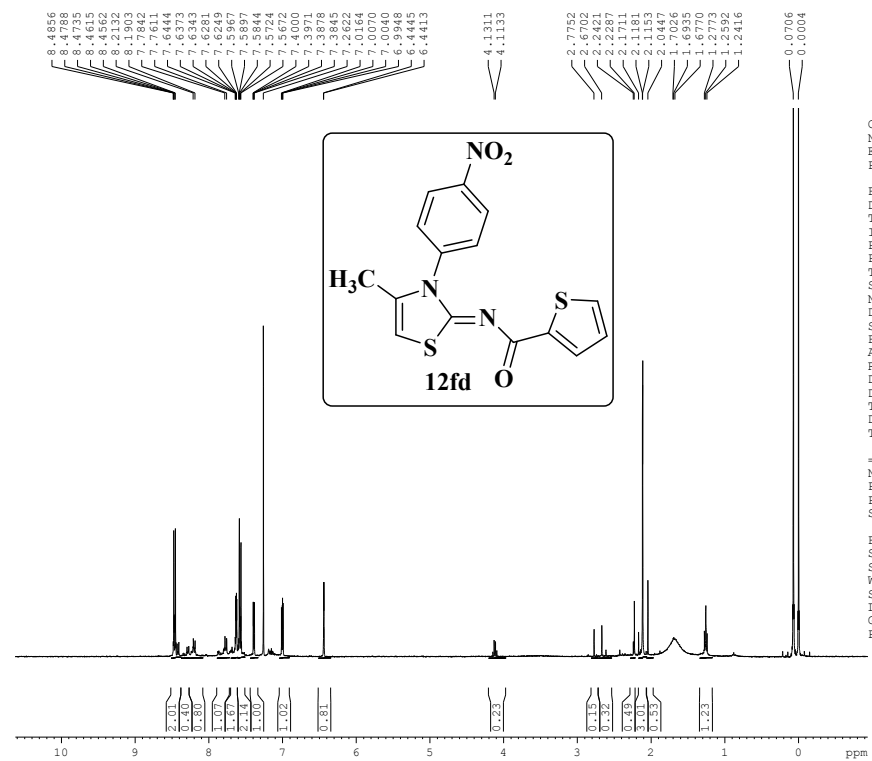

BRUKER  
 AVANCE II 400 NMR  
 Spectrometer  
 SAIF  
 Panjab University  
 Chandigarh

Current Data Parameters  
 NAME Aug03-2016  
 EXPNO 40  
 FROCN0 1

F2 - Acquisition Parameters  
 Date 20160803  
 Time 14.44  
 INSTRUM spect  
 PROBHD 5 mm PABBO BB-  
 PULPROG zg30  
 TD 65536  
 SOLVENT CDCl3  
 NS 8  
 DS 2  
 SWH 12019.230 Hz  
 FIDRES 0.183393 Hz  
 AQ 2.7263477 sec  
 RG 512  
 DW 41.600 usec  
 DE 6.00 usec  
 TE 299.3 K  
 D1 1.0000000 sec  
 TD0 1

===== CHANNEL f1 =====  
 NUC1 1H  
 P1 10.90 usec  
 PL1 -3.00 dB  
 SF01 400.1324710 MHz

F2 - Processing parameters  
 SI 32768  
 SF 400.1300089 MHz  
 WDW EM  
 SSB 0  
 LB 0.30 Hz  
 GB 0  
 PC 1.00

manishkumarmanu1986@gmail.com

S23: <sup>1</sup>H-NMR spectrum of compound 12fd

## 2D NMR (HMBC and HMQC)

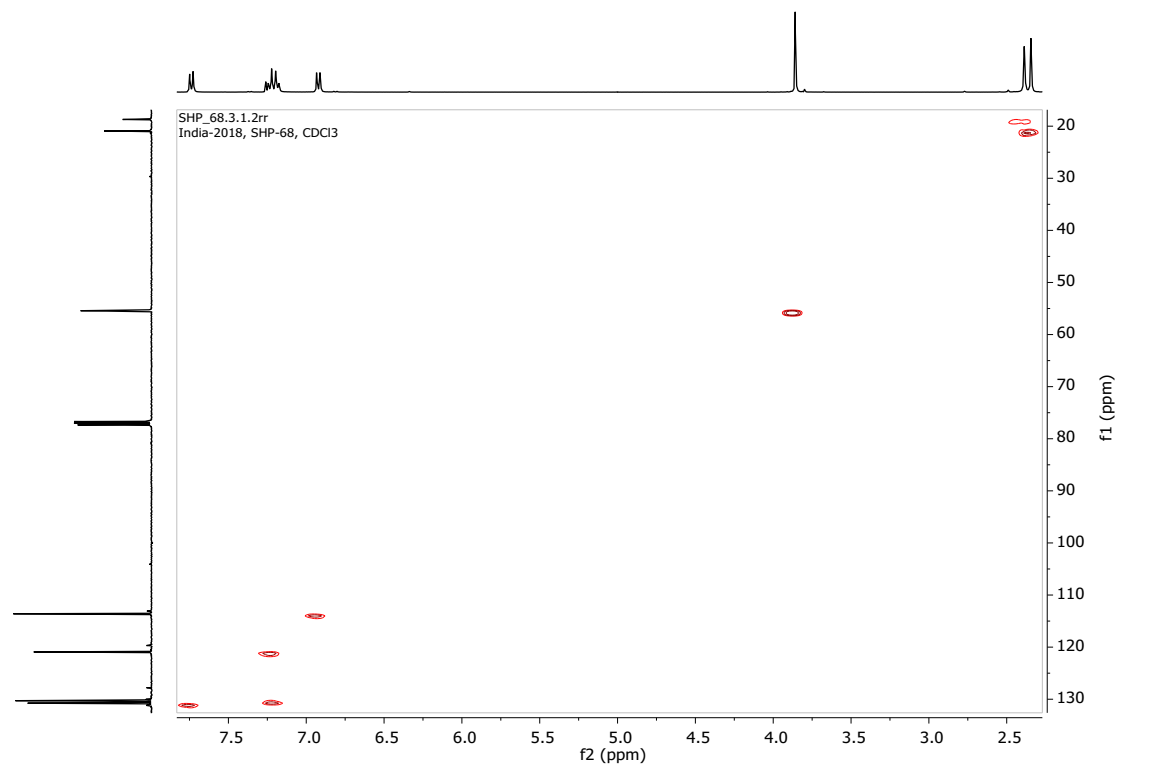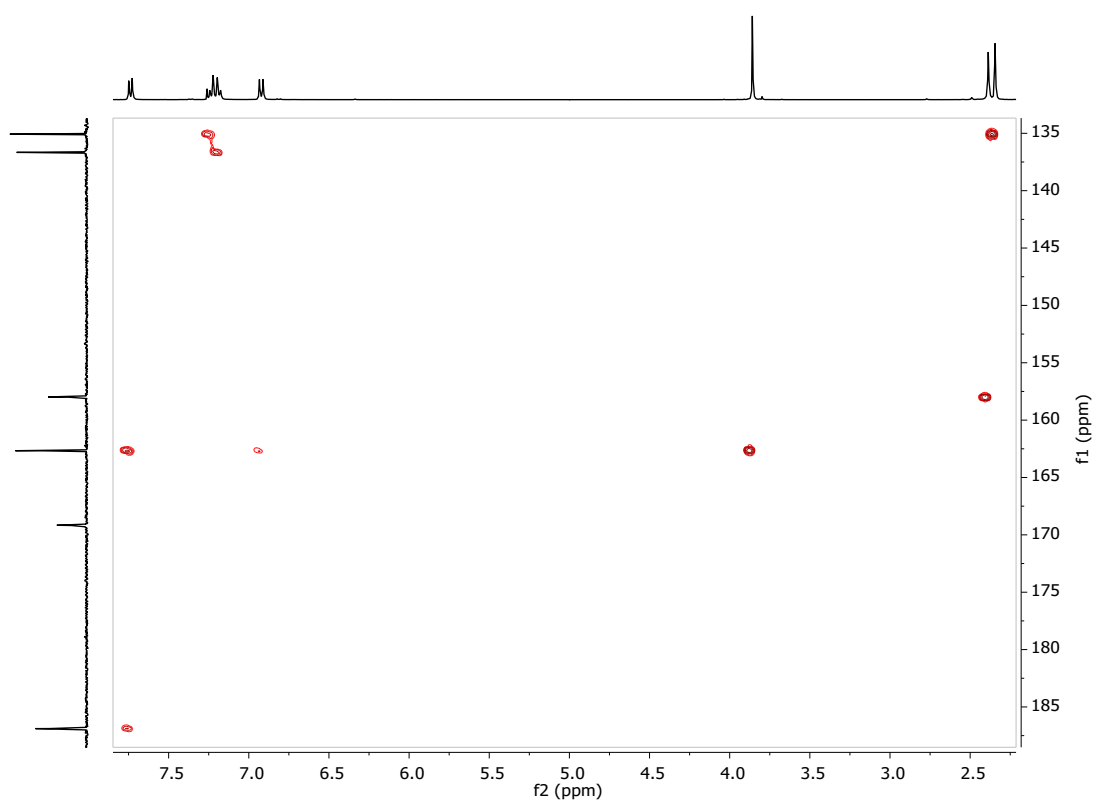

S7: 2D-spectrum of 2-(*N*-phenylamino)-4-methyl-5-(*p*-methoxybenzoyl)thiazole (**8ac**)

**Table-S1:** NMR data in CDCl<sub>3</sub>, chemical shifts ( $\delta$ , ppm) and coupling constants ( $J$ , Hz) for compound **8ac**

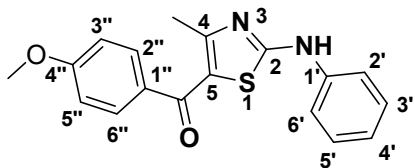

| Chemical shifts<br>( $\delta$ in ppm) | gs-HMQC<br>correlation       | gs-HMBC<br>correlation                                              | Assignments          |
|---------------------------------------|------------------------------|---------------------------------------------------------------------|----------------------|
| 186.9                                 | ---                          | 7.74 (2'',6''-H)                                                    | CO                   |
| 169.2                                 | ---                          | -----                                                               | C-2                  |
| 162.7                                 | ---                          | 7.74 (2'',6''-H)<br>6.92(3'',5''-H)<br>3.86 (4''-OCH <sub>3</sub> ) | C-4''                |
| 158.0                                 | ---                          | 2.39 (4-CH <sub>3</sub> )                                           | C-4                  |
| 136.6                                 | ---                          | 7.19 (3',5'-H)                                                      | C1'                  |
| 135.1                                 | ---                          | 7.23 (2',6'-H)<br>2.34 (4'-CH <sub>3</sub> )                        | C-4'                 |
| 132.9                                 | ---                          | 6.92 (3'',5''-H)                                                    | C-1''                |
| 130.7                                 | 7.74 (2'',6''-H)             | 7.74 (2'',6''-H)                                                    | C-2'',6''            |
| 130.3                                 | 7.19 (3',5'-H)               | 7.19 (3',5'-H)<br>2.34 (4'-CH <sub>3</sub> )                        | C-3',C5'             |
| 120.9                                 | 7.23 (2',6'-H)               | 7.23 (2',6'-H)<br>2.39 (4-CH <sub>3</sub> )                         | C-2',6'              |
| 119.7                                 | -                            | 2.39 (4-CH <sub>3</sub> )                                           | C-5                  |
| 113.6                                 | 6.92 (3'',5''-H)             | 6.92 (3'',5''-H)                                                    | C-3'',5''            |
| 55.4 ( <sup>1</sup> J=144.1)          | 3.86 (4''-OCH <sub>3</sub> ) | -                                                                   | 4''-OCH <sub>3</sub> |
| 20.9 ( <sup>1</sup> J=126.5)          | 2.34 (4'-CH <sub>3</sub> )   | 7.19 (3',5'-H)                                                      | 4'-CH <sub>3</sub>   |
| 18.7 ( <sup>1</sup> J=126.7)          | 2.39 (4-CH <sub>3</sub> )    | -                                                                   | 4-CH <sub>3</sub>    |

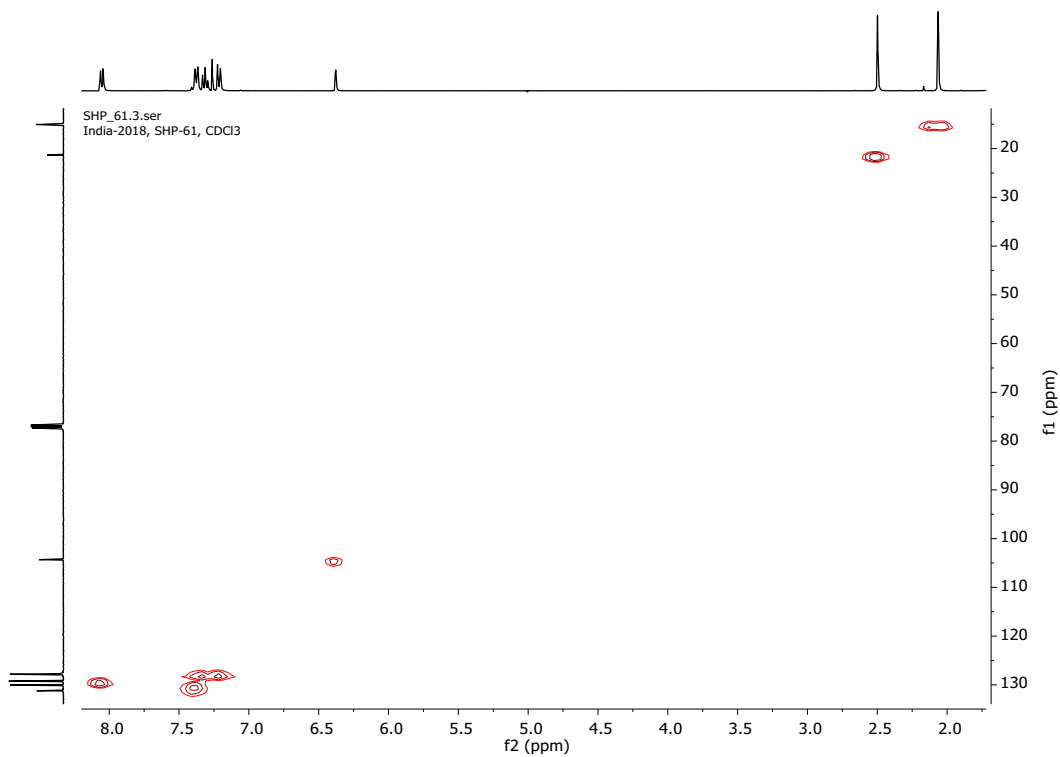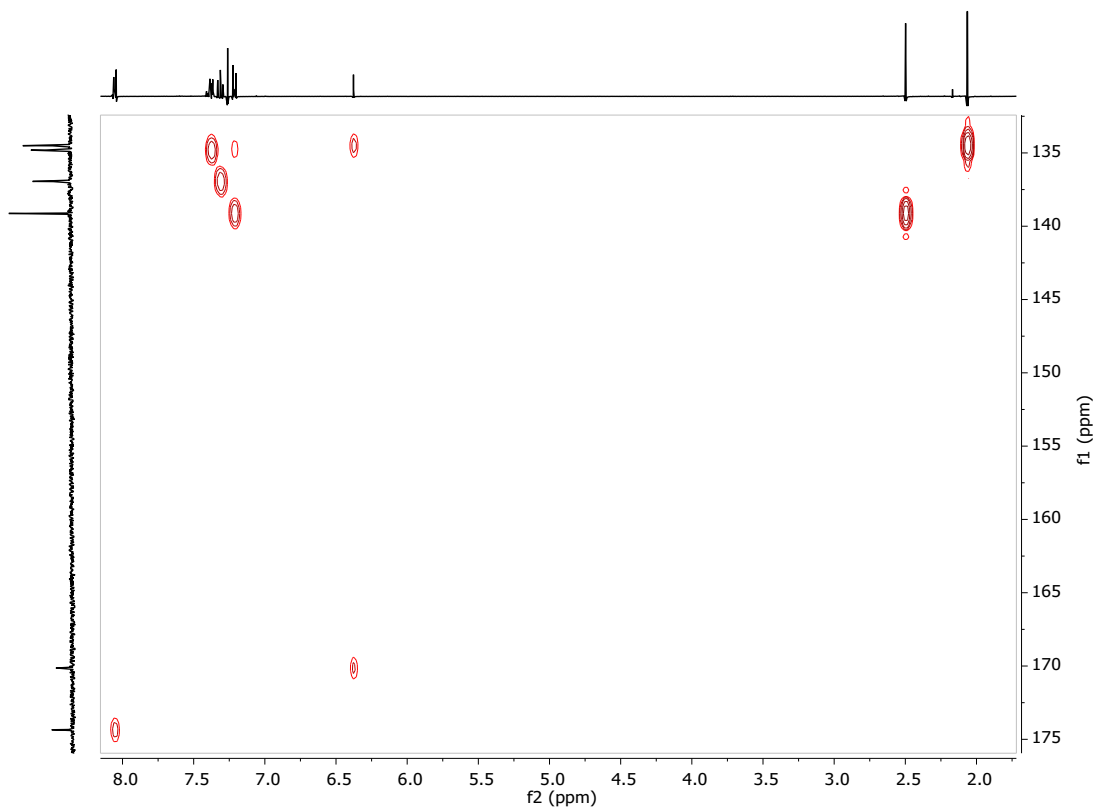

S30: 2D-NMR spectrum of 2-(*N*-benzoylimino)-3-*N*-(*p*-methylphenyl)-4-methylthiazole (**12da**)

**Table S2:** NMR data in CDCl<sub>3</sub>, chemical shifts ( $\delta$ , ppm) and coupling constants ( $J$ , Hz) for compound **8da**

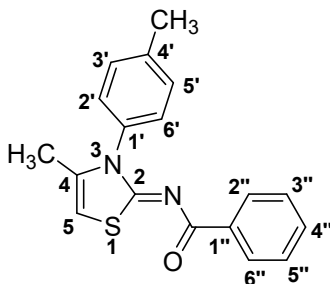

| Chemical shifts<br>( $\delta$ in ppm) | gs-HMQC<br>correlation     | gs-HMBC<br>correlation                         | Assignments        |
|---------------------------------------|----------------------------|------------------------------------------------|--------------------|
| 174.3                                 | -                          | 8.05 (2'',6''-H)                               | CO                 |
| 170.1                                 | -                          | 6.38 (5-H)                                     | C-2                |
| 139.1                                 | -                          | 2.50 (4'-CH <sub>3</sub> ) /<br>7.21 (2',6'-H) | C-4'               |
| 136.9                                 | -                          | 7.37-7.41 (3',5'-H)                            | C-1'               |
| 134.8                                 | -                          | 7.37-7.41 (4''-H)                              | C-1''              |
| 134.5                                 | -                          | 2.06 (4-CH <sub>3</sub> ) /<br>6.38 (5-H)      | C-4                |
| 131.2                                 | 7.37-7.41 (4''-H)          | 8.05 (2'',6''-H)                               | C-4''              |
| 130.1                                 | 7.37-7.41(3',5'-<br>H)     | 2.50 (4'-CH <sub>3</sub> )                     | C-3',5'            |
| 129.2                                 | 8.05 (2'',6''-H)           | 7.37-7.41 (4''-H)                              | C-2'',6''          |
| 127.8                                 | 7.31 (3'',5''-H)           | 7.31 (3'',5''-H)                               | C-3'',5''          |
| 127.7                                 | 7.21 (2',6'-H)             | -                                              | C-2',6'            |
| 104.3                                 | 6.38 (5-H)                 | 2.06 (4-CH <sub>3</sub> )                      | C-5                |
| 21.3 ( <sup>1</sup> J=132.0)*         | 2.50 (4'-CH <sub>3</sub> ) | 7.37-7.41 (3',5'-H)                            | 4'-CH <sub>3</sub> |
| 15.1 ( <sup>1</sup> J=129.2)*         | 2.06 (4-CH <sub>3</sub> )  | 6.38 (5-H)                                     | 4-CH <sub>3</sub>  |
| -206.1                                | -                          | 2.06 (4-CH <sub>3</sub> ) /<br>6.38 (5-H)      | N                  |

\*Measurements on HMBC

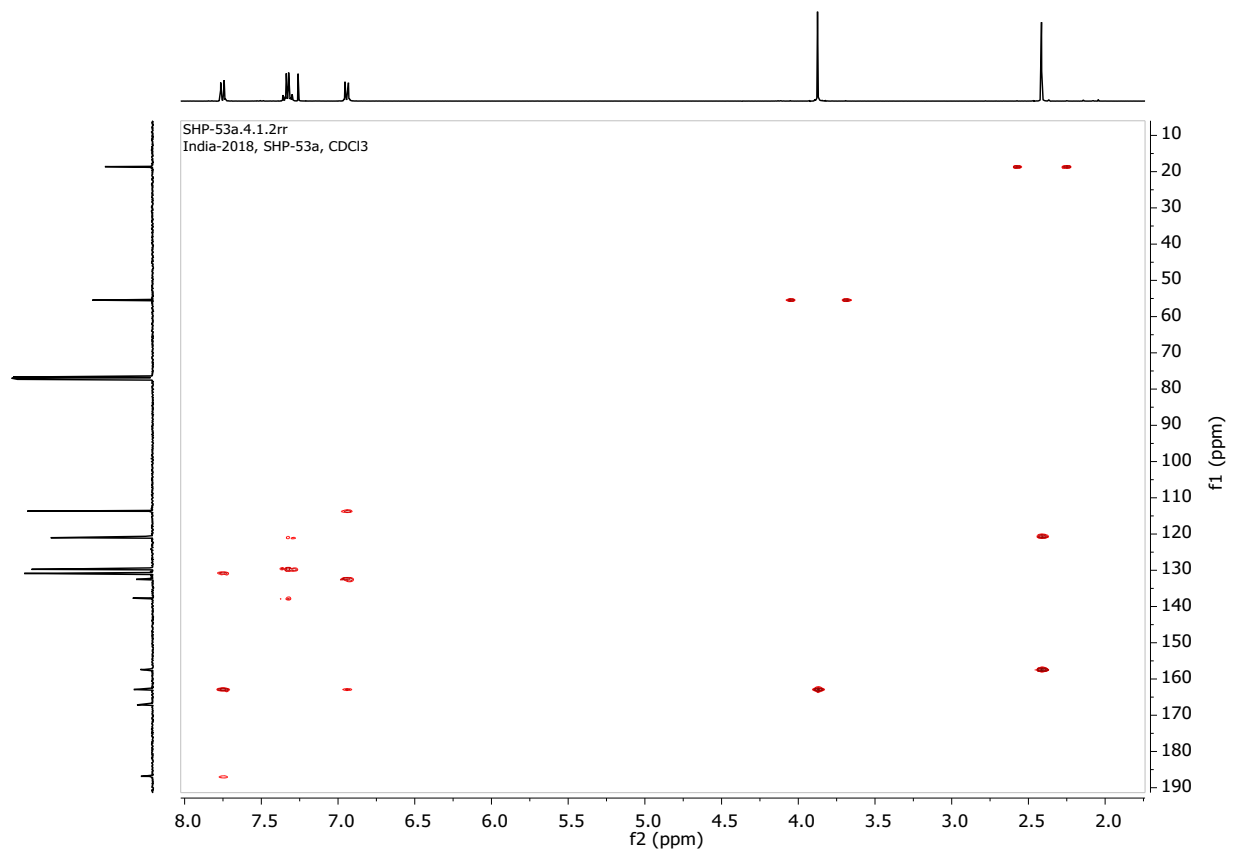

S39: 2D-spectrum of 2-(*N*-(*p*-chlorophenyl)amino)-4-methyl-5-(*p*-methoxybenzoyl)thiazole (**8bc**)

**Table S3:** NMR data in CDCl<sub>3</sub>, chemical shifts ( $\delta$ , ppm) and coupling constants ( $J$ , Hz) for compound **8bc**

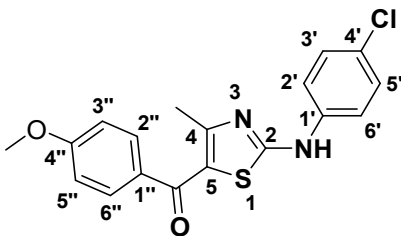

| Chemical shifts<br>( $\delta$ in ppm) | gs-HMQC<br>correlation       | gs-HMBC<br>correlation                                               | Assignments          |
|---------------------------------------|------------------------------|----------------------------------------------------------------------|----------------------|
| 186.9                                 | -                            | 7.75 (2'',6''-H)                                                     | CO                   |
| 167.1                                 | -                            | -                                                                    | C-2                  |
| 162.9                                 | -                            | 3.87 (4''-OCH <sub>3</sub> )<br>6.94 (3'',5''-H)<br>7.75 (2'',6''-H) | C-4''                |
| 157.4                                 | -                            | 2.41 (4-CH <sub>3</sub> )                                            | C-4                  |
| 137.7                                 | -                            | 7.35 (3',5'-H)                                                       | C-4'                 |
| 132.5                                 | -                            | 6.94 (3'',5''-H)                                                     | C-1''                |
| 130.9                                 | 7.75 (2'',6''-H)             | 7.75 (2'',6''-H)                                                     | C-2'',6''            |
| 129.7                                 | 7.35 (3',5'-H)               | 7.35 (3',5'-H)                                                       | C-3',5'              |
| 121.0                                 | 7.31 (2',6'-H)               | 7.31 (2',6'-H)                                                       | C-2',6'              |
| 120.6                                 | -                            | 2.41 (4-CH <sub>3</sub> )                                            | C-3                  |
| 113.7                                 | 6.94 (3'',5''-H)             | 6.94 (3'',5''-H)                                                     | C-3'',5''            |
| 55.5                                  | 3.87 (4''-OCH <sub>3</sub> ) | -                                                                    | 4''-OCH <sub>3</sub> |
| 18.6                                  | 2.41 (4-CH <sub>3</sub> )    | -                                                                    | 4-CH <sub>3</sub>    |



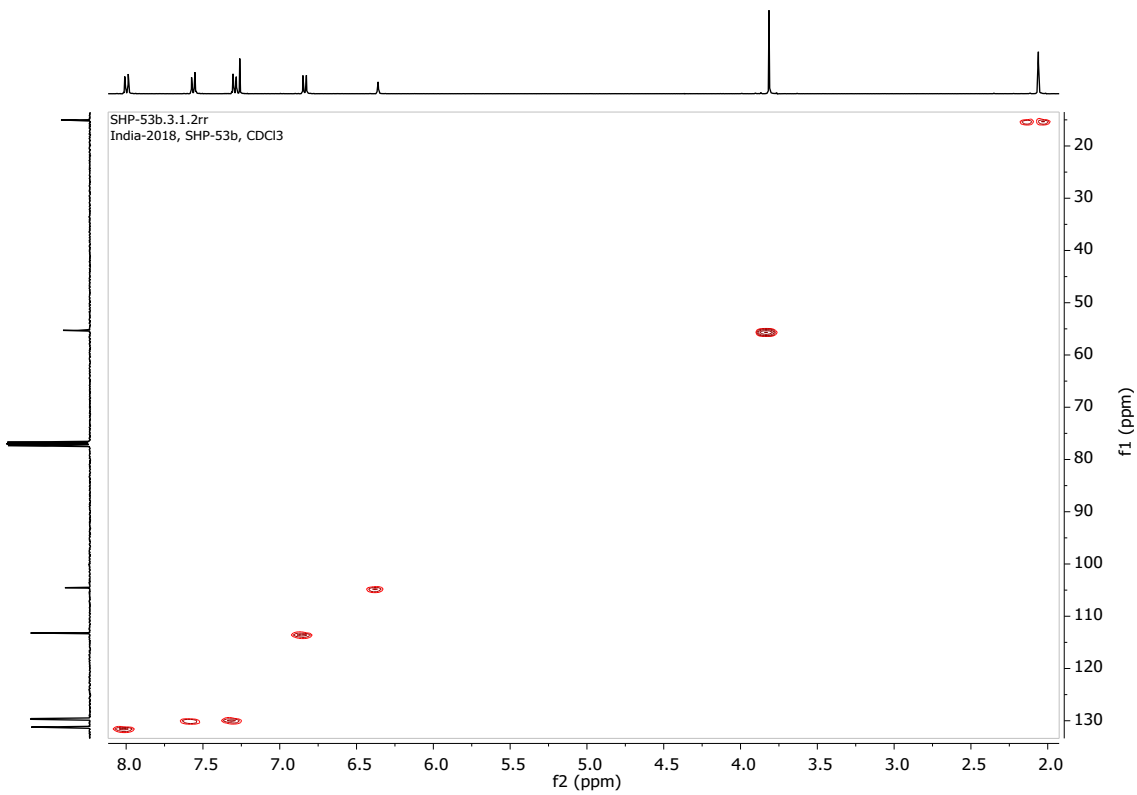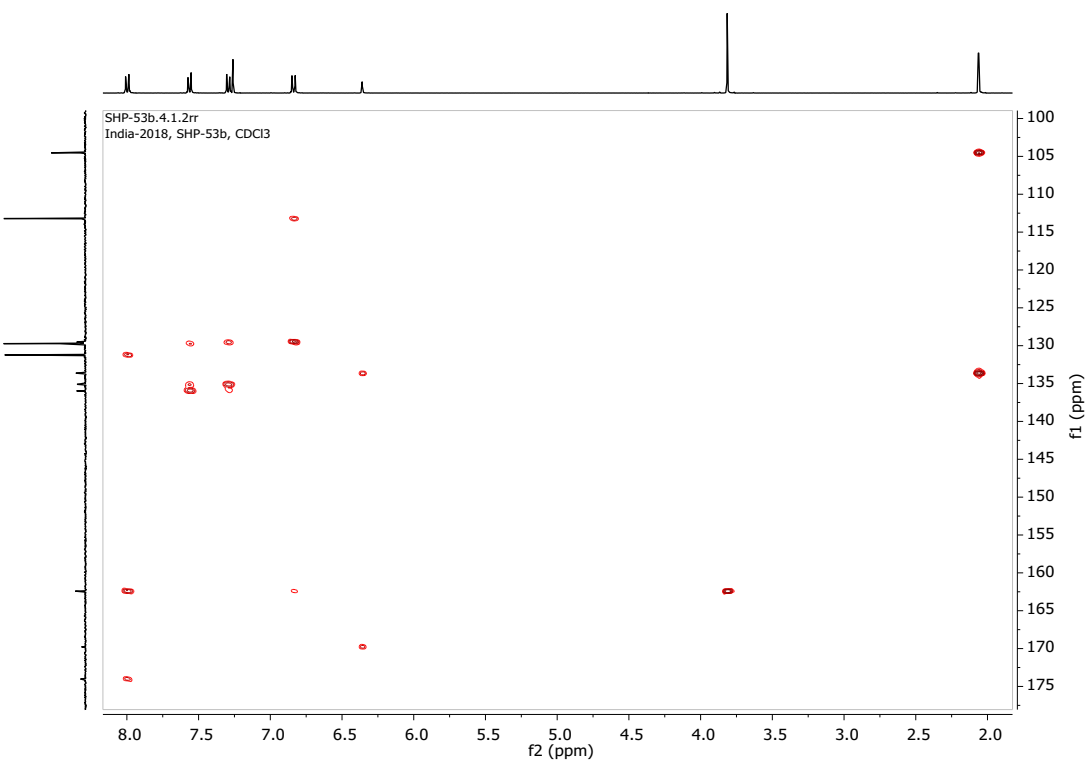

S42: 2D-spectrum of 2-(*N*-(*p*-methoxybenzoyl)imino)-3-*N*-(*p*-chlorophenyl)-4-methylthiazole (12bc)

**Table S4:** NMR data in CDCl<sub>3</sub>, chemical shifts ( $\delta$ , ppm) and coupling constants ( $J$ , Hz) for compound **12bc**

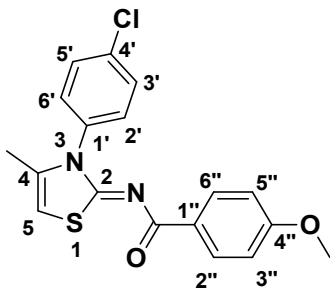

| Chemical shifts<br>( $\delta$ in ppm) | gs-HMQC<br>correlation                   | gs-HMBC<br>correlation                                                 | Assignments          |
|---------------------------------------|------------------------------------------|------------------------------------------------------------------------|----------------------|
| 174.0                                 | -                                        | 8.00 (2'',6''-H)                                                       | CO                   |
| 169.8                                 | -                                        | 6.36 (5-H)                                                             | C-2                  |
| 162.4                                 | -                                        | 8.00 (2'',6''-H)/<br>6.84 (3'',5''-H)/<br>3.81 (4''-OCH <sub>3</sub> ) | C-4''                |
| 136.0                                 | -                                        | 7.56 (2',6'-H)/<br>7.29 (3',5'-H)                                      | C-1'                 |
| 135.1                                 | -                                        | 7.56 (2',6'-H)/<br>7.29 (3',5'-H)                                      | C-4'                 |
| 133.6                                 | -                                        | 6.36 (5-H)/<br>2.06 (4-CH <sub>3</sub> )                               | C-5                  |
| 131.2 ( <sup>1</sup> J=161.9)         | 8.00 (2'',6''-H)                         | 8.00 (2'',6''-H)                                                       | C-2'',6''            |
| 129.7 ( <sup>1</sup> J=161.8)         | 7.56 (2',6'-H)                           | 7.56 (2',6'-H)                                                         | C-2',6'              |
| 129.6 ( <sup>1</sup> J=162.3)         | 7.29 (3',5'-H)                           | 7.29 (3',5'-H)                                                         | C-3',5'              |
| 129.5                                 | -                                        | 6.84 (3'',5''-H)                                                       | C-1''                |
| 113.2 ( <sup>1</sup> J=158.7)         | 6.84 (3'',5''-H)                         | 6.84 (3'',5''-H)                                                       | C-3'',5''            |
| 104.5 ( <sup>1</sup> J=189.4)         | 6.36 (5-H),<br>2.06 (4-CH <sub>3</sub> ) | 2.06 (4-CH <sub>3</sub> )                                              | C-4                  |
| 55.3 ( <sup>1</sup> J=144.5)          | 3.81 (4''-OCH <sub>3</sub> )             | -                                                                      | 4''-OCH <sub>3</sub> |

---

15.0 ( $^1J=130.1$ )

2.06 (4-CH<sub>3</sub>)

6.36 (5-H),

4-CH<sub>3</sub>

---

### X-RAY ANALYTICAL DATA

**Table S5:** Summary of the fundamental crystal and refinement data for compounds **8aa**, **12bc** and **12da**.

|                                    | <b>8aa</b>                                        | <b>12bc</b>                                                       | <b>12da</b>                                       |
|------------------------------------|---------------------------------------------------|-------------------------------------------------------------------|---------------------------------------------------|
| Empirical formula                  | C <sub>17</sub> H <sub>14</sub> N <sub>2</sub> OS | C <sub>18</sub> H <sub>15</sub> N <sub>2</sub> O <sub>2</sub> SCl | C <sub>18</sub> H <sub>16</sub> N <sub>2</sub> OS |
| Formula weight                     | 294.08                                            | 358.83                                                            | 308.39                                            |
| Crystal system                     | Monoclinic                                        | Triclinic                                                         | Orthorhombic                                      |
| Space group                        | <i>C2/c</i>                                       | <i>P-1</i>                                                        | <i>Pnma</i>                                       |
| a/Å                                | 19.262(3)                                         | 9.463(1)                                                          | 20.128(1)                                         |
| b/Å                                | 4.9631(9)                                         | 9.661(1)                                                          | 6.9154(5)                                         |
| c/Å                                | 30.819(5)                                         | 11.003(1)                                                         | 11.3450(9)                                        |
| α/°                                | 90                                                | 107.810(2)                                                        | 90                                                |
| β/°                                | 98.509(3)                                         | 110.578(2)                                                        | 90                                                |
| γ/°                                | 90                                                | 96.950(2)                                                         | 90                                                |
| Volume/Å <sup>3</sup>              | 2913.8(9)                                         | 866.6(2)                                                          | 1579.2(2)                                         |
| Z                                  | 6                                                 | 2                                                                 | 4                                                 |
| ρ <sub>calc</sub> /cm <sup>3</sup> | 1.342                                             | 1.375                                                             | 1.297                                             |
| μ/mm <sup>-1</sup>                 | 0.222                                             | 0.353                                                             | 0.208                                             |
| F(000)                             | 1232.0                                            | 372.0                                                             | 648.0                                             |
| Crystal size/mm <sup>3</sup>       | 0.64 × 0.11 × 0.03                                | 0.34 × 0.15 ×<br>0.11                                             | 0.31 × 0.25 ×<br>0.09                             |
| 2θ range for data collection/°     | 2.672 to 57.888                                   | 4.266 to 58.18                                                    | 4.048 to 57.976                                   |
| Index ranges                       | -24 ≤ h ≤ 24, -6 ≤ k ≤ 6, -40 ≤ l ≤ 39            | -12 ≤ h ≤ 12, -12 ≤ k ≤ 12, -14 ≤ l ≤ 14                          | -25 ≤ h ≤ 26, -9 ≤ k ≤ 9, -15 ≤ l ≤ 15            |
| Reflections collected              | 13672                                             | 9160                                                              | 15926                                             |
| Independent reflections            | 3533 [R <sub>int</sub> = 0.0849, Rσ = 0.0951]     | 4135 [R <sub>int</sub> = 0.0444, Rσ = 0.0561]                     | 2163 [R <sub>int</sub> = 0.0629, Rσ = 0.0424]     |

|                                             |              |              |              |
|---------------------------------------------|--------------|--------------|--------------|
| Data/restraints/parameters                  | 3533/0/233   | 4135/0/219   | 2163/0/129   |
| Goodness-of-fit on F <sup>2</sup>           | 0.967        | 0.970        | 1.004        |
| Final R indexes                             | R1 = 0.0580  | R1 = 0.0485  | R1 = 0.0441  |
| [I>2σ(I)] <sup>a</sup>                      | wR2 = 0.1336 | wR2 = 0.1116 | wR2 = 0.1198 |
| Final R indexes [all data] <sup>b</sup>     | R1 = 0.1173  | R1 = 0.0995  | R1 = 0.0880  |
|                                             | wR2 = 0.1535 | wR2 = 0.1292 | wR2 = 0.1378 |
| Largest diff. peak/hole / e Å <sup>-3</sup> | 0.29/-0.36   | 0.25/-0.23   | 0.19/-0.23   |

<sup>a</sup>  $R1 = \frac{\sum ||F_o| - |F_c||}{\sum |F_o|}$

<sup>b</sup>  $wR2 = \frac{\sum [w(F_o^2 - F_c^2)^2]}{\sum [w(F_o^2)^2]}$
